# Supplementary material for: Peroxide-mediated synthesis of benzimidazo[2,1-a]isoquinoline-6(5H)-ones via cascade methylation/ethylation and intramolecular cyclization
Source: Royal Society of Chemistry journal article supplement (doi:10.1039/d0ob02383c), 2020-12-15

# Supporting Information

**Peroxide-mediated synthesis of  
benzimidazo[2,1-a]isoquinoline-6(5H)-ones via cascade  
methylation/ethylation and intramolecular cyclization**

Changduo Pan,\* Cheng Yuan and Jin-Tao Yu\*

*E-mail: panchangduo@jsut.edu.cn; yujintao@cczu.edu.cn*

1. Mechanistic Studies.....S2
2. Copies of <sup>1</sup>H NMR and <sup>13</sup>C NMR spectra of the unknown substrate.....S6
3. Copies of <sup>1</sup>H NMR and <sup>13</sup>C NMR spectra of the products.....S10

## 1. Mechanistic Studies

### 1.1 Methyl Radical Capture Experiments

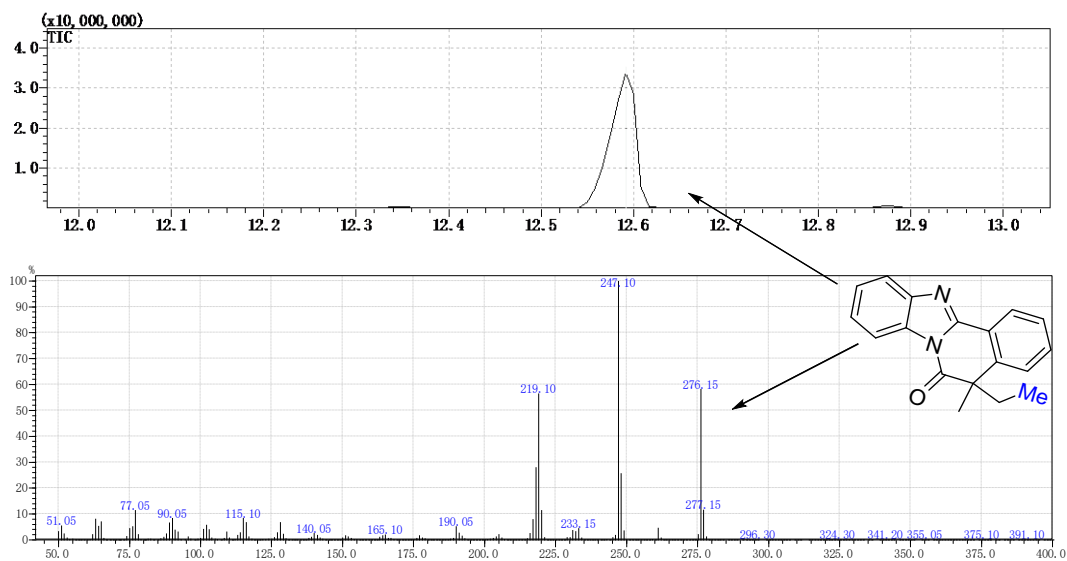

Figure S1 GC-MS spectra of the 3a

### Standard Procedure + TEMPO (2.0 equiv):

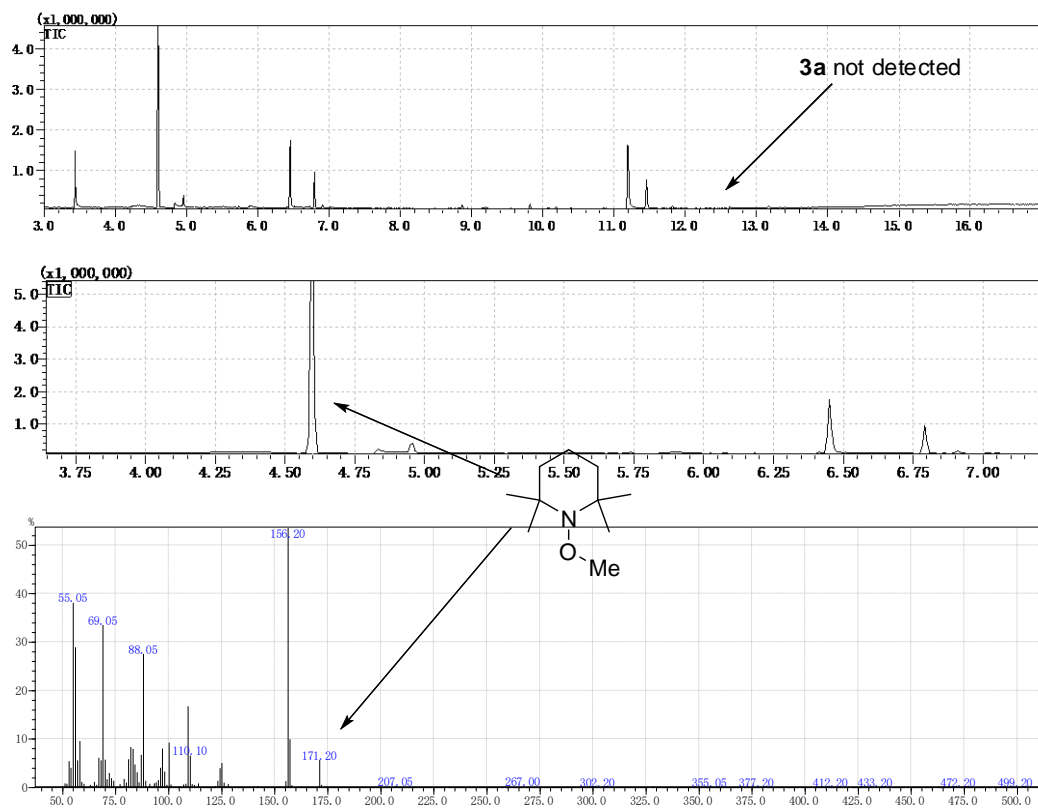

Figure S2 GC-MS spectra of the methyl radical capture results by TEMPO

Standard Procedure + BHT (2.0 equiv):

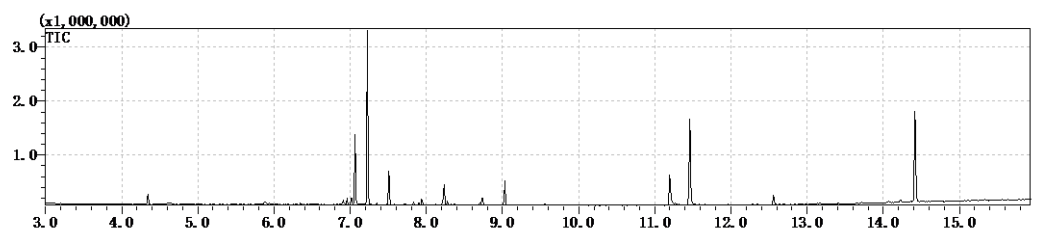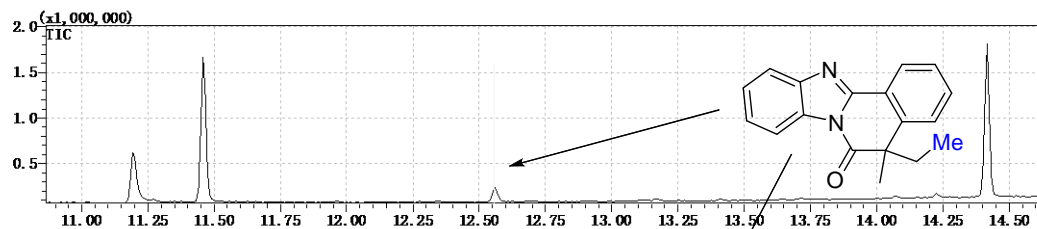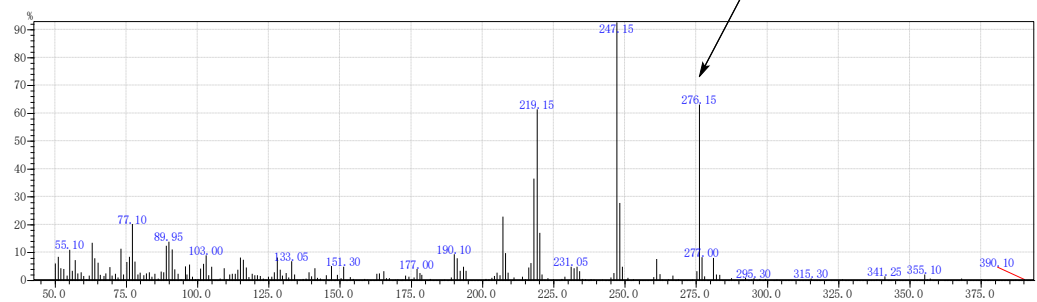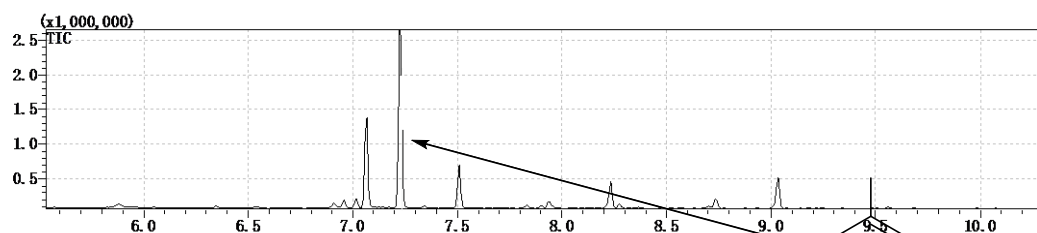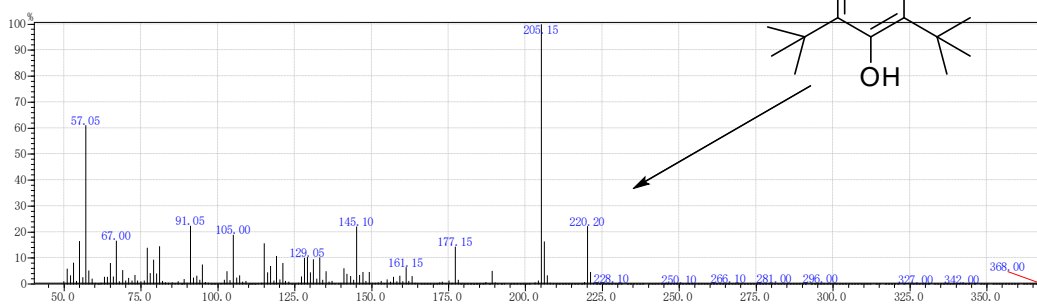

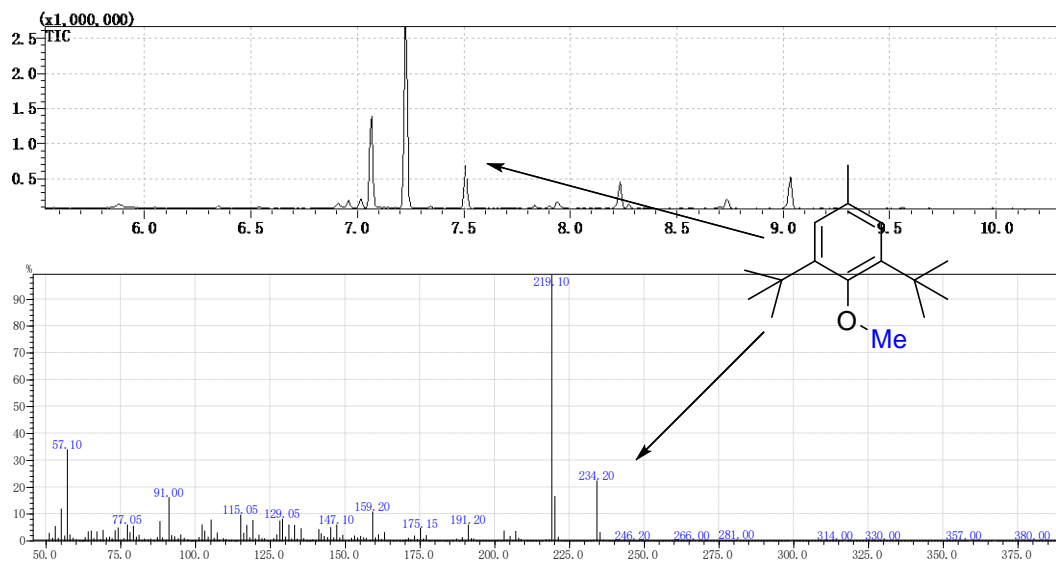

Figure S3 GC-MS spectra of the methyl radical capture results by BHT

## 1.2 The detection of acetone and *tert*-butanol

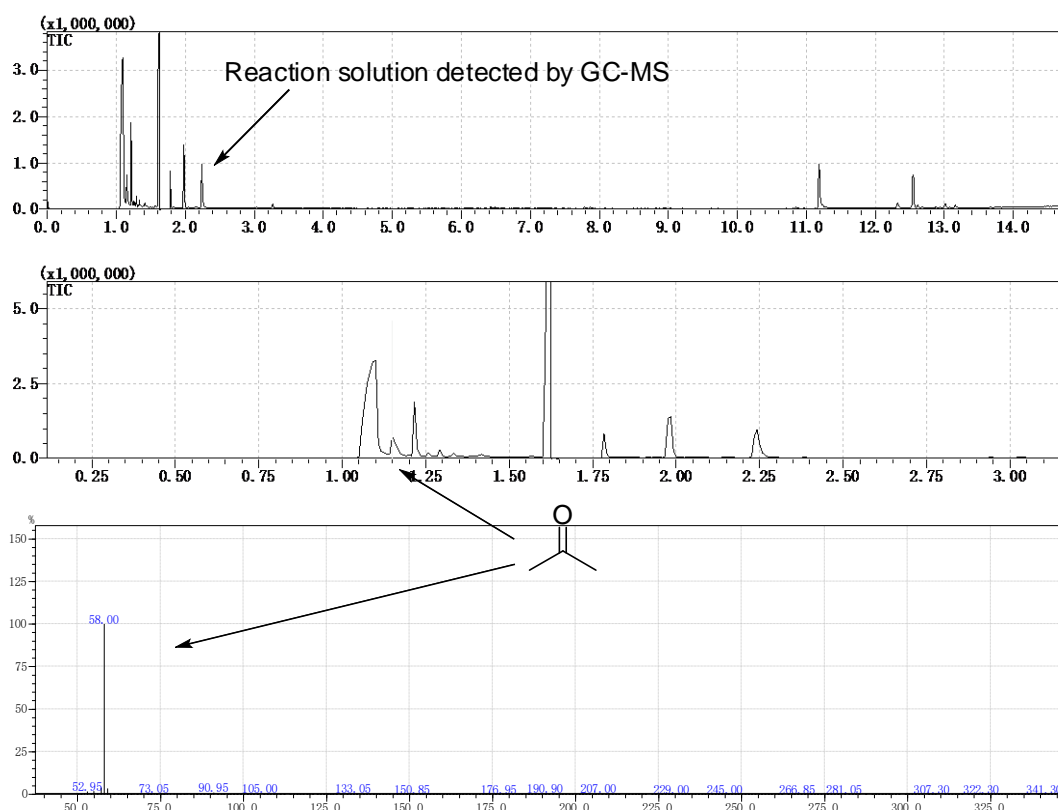

Figure S4 GC-MS spectra for detection of acetone

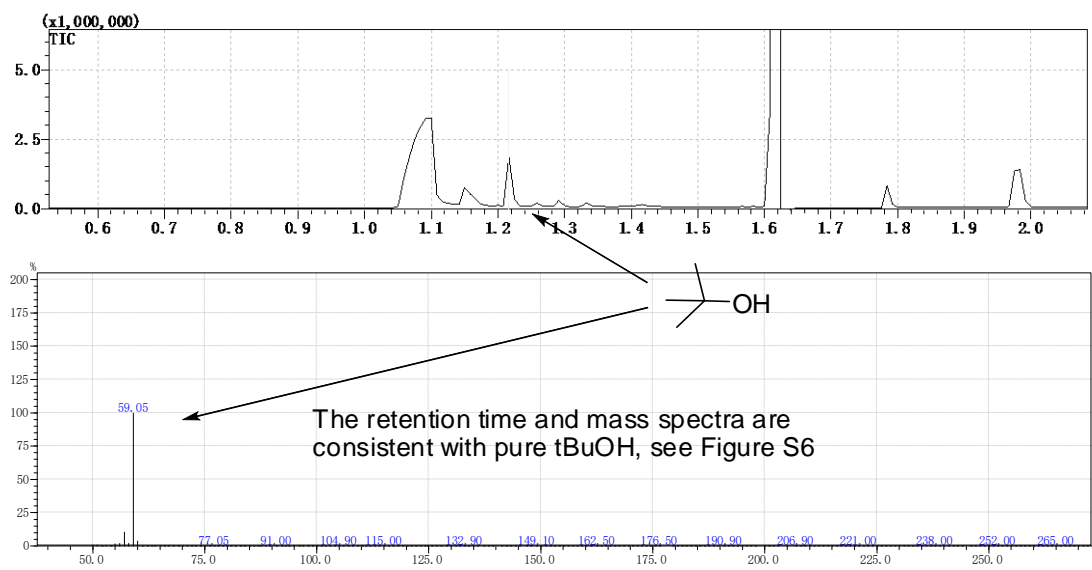

Figure S5 GC-MS spectra for detection of tert-butanol

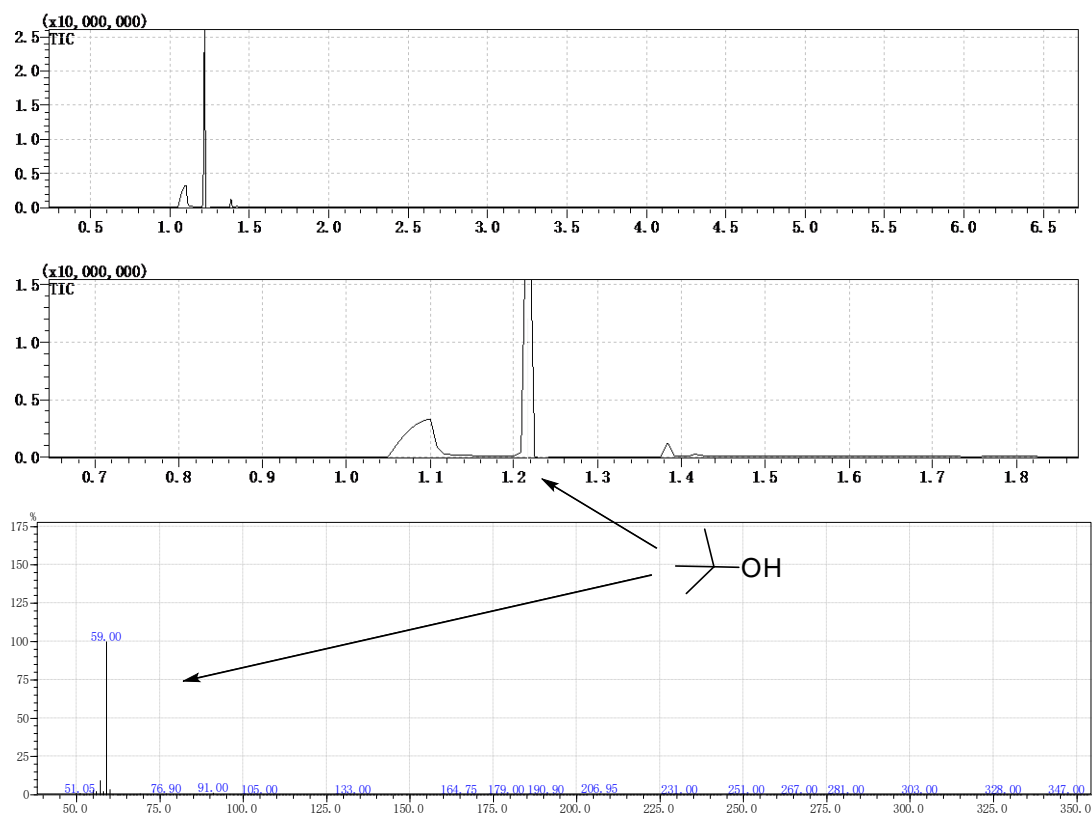

Figure S6 GC-MS spectra of pure *tert*-butanol

2. Copies of  $^1\text{H}$  NMR and  $^{13}\text{C}$  NMR spectra of the unknown substrate

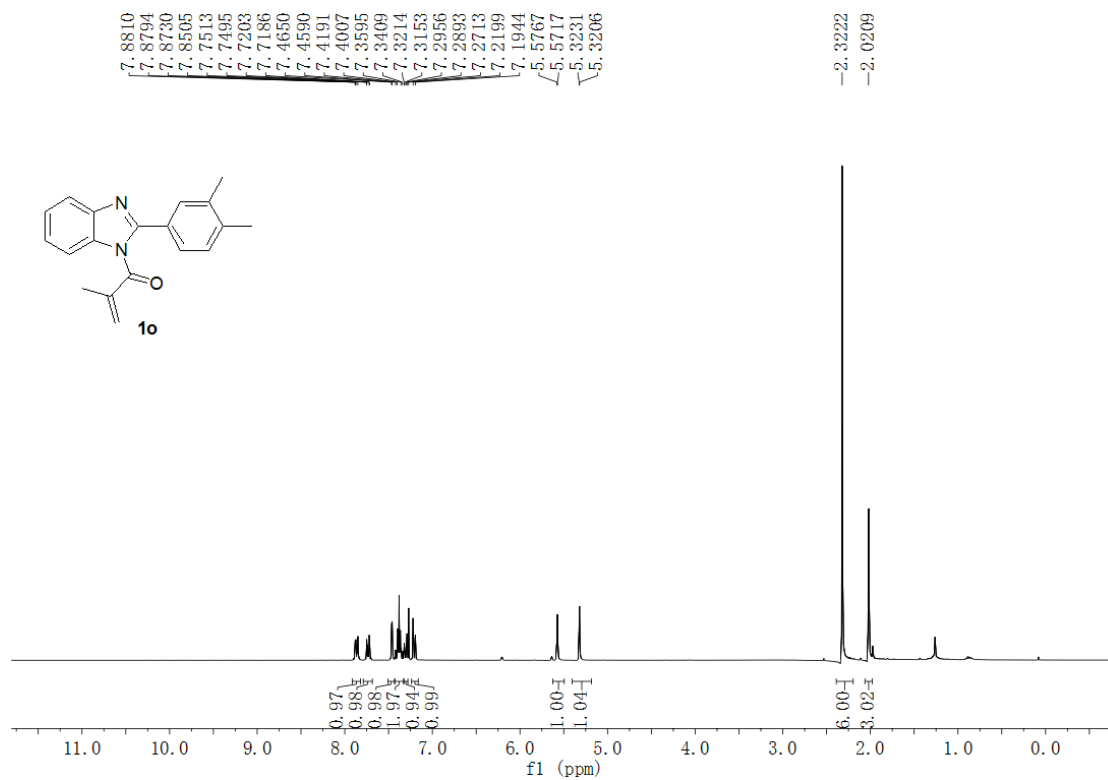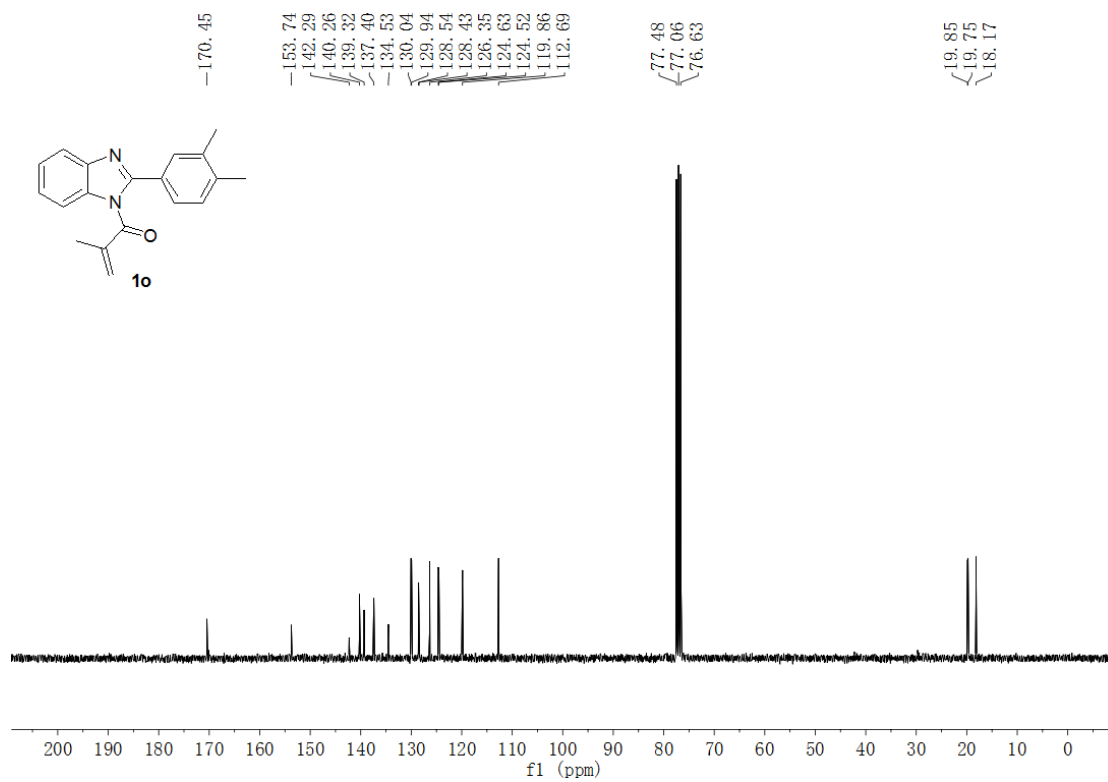

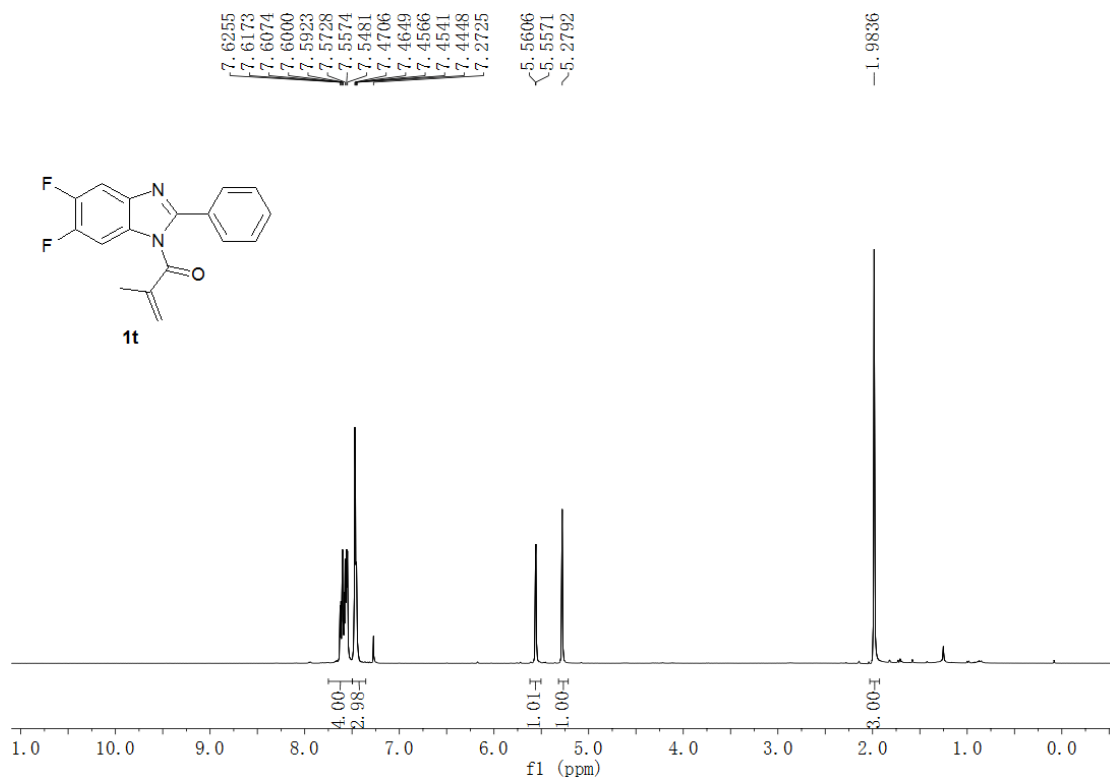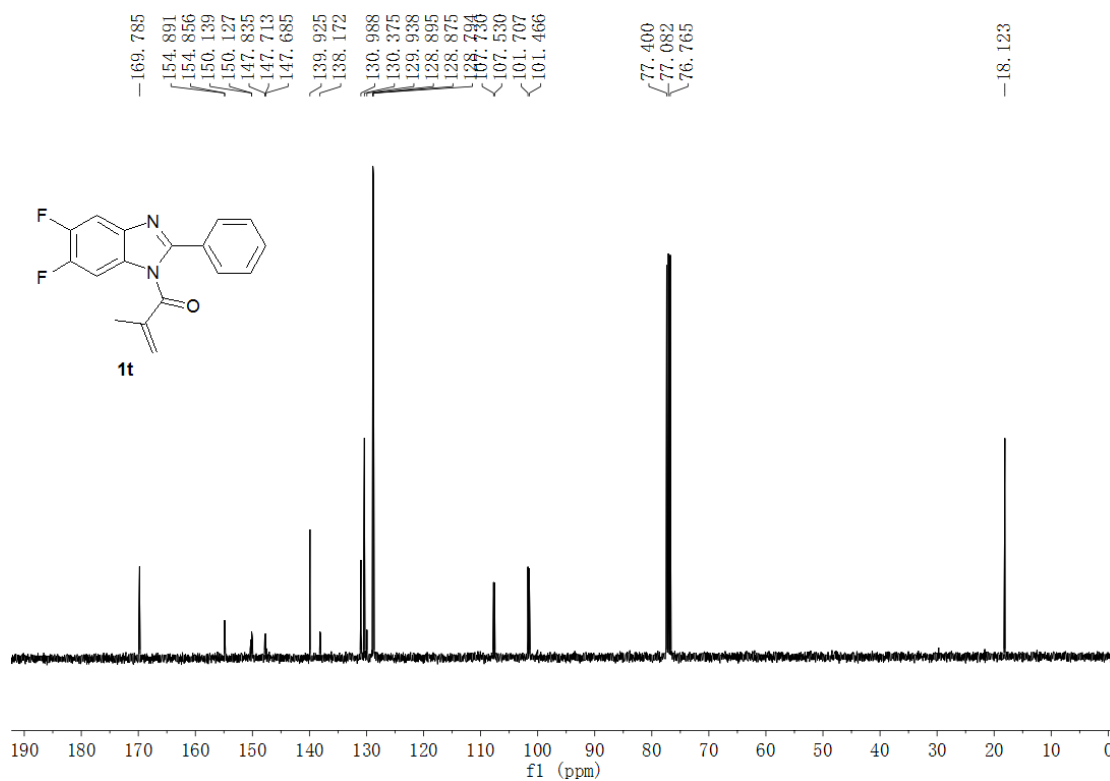

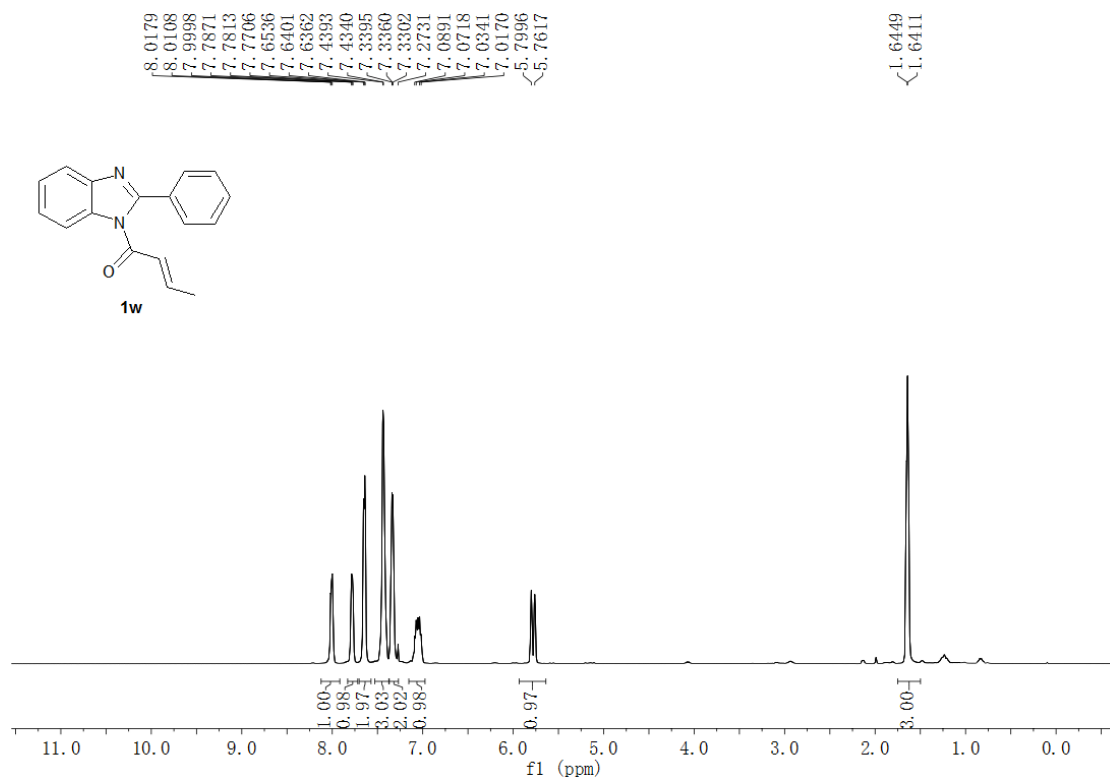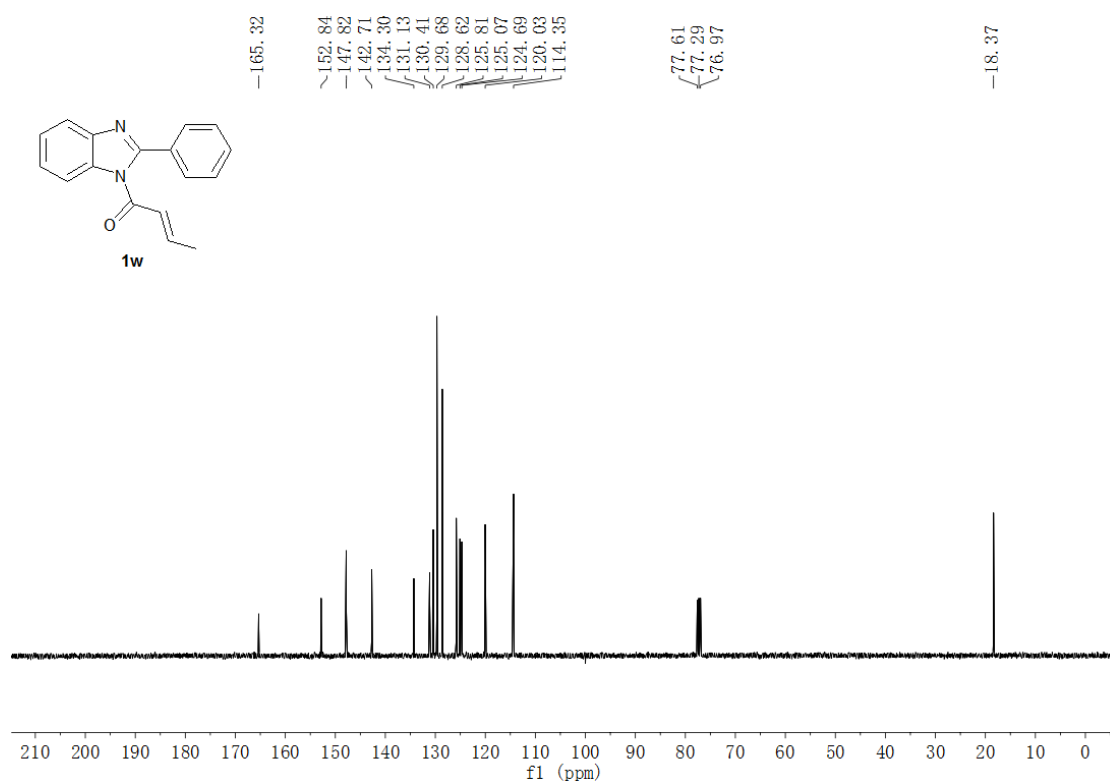



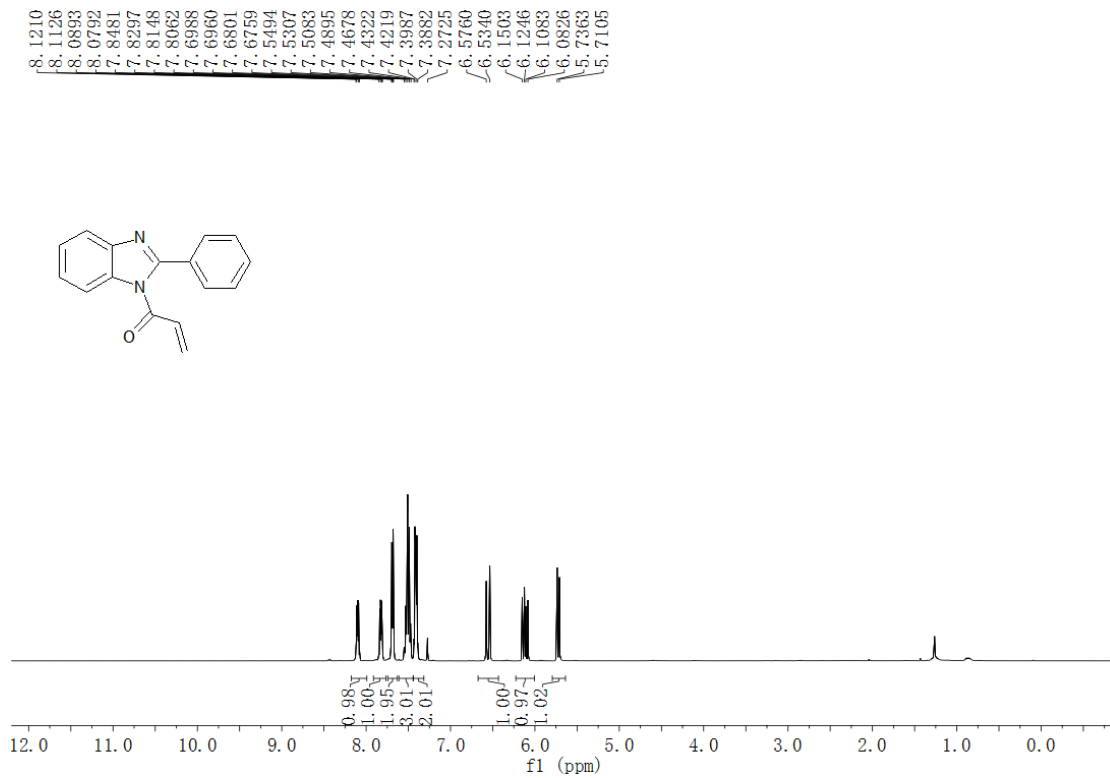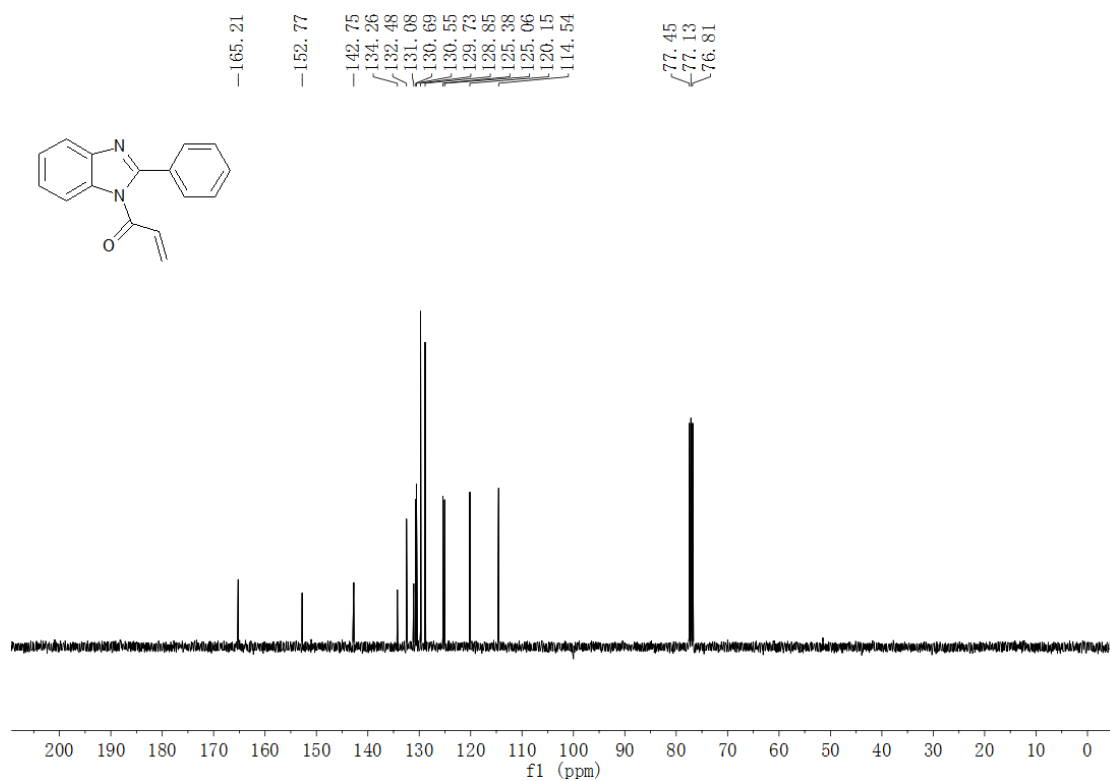

### 3. Copies of $^1\text{H}$ NMR and $^{13}\text{C}$ NMR spectra of the products

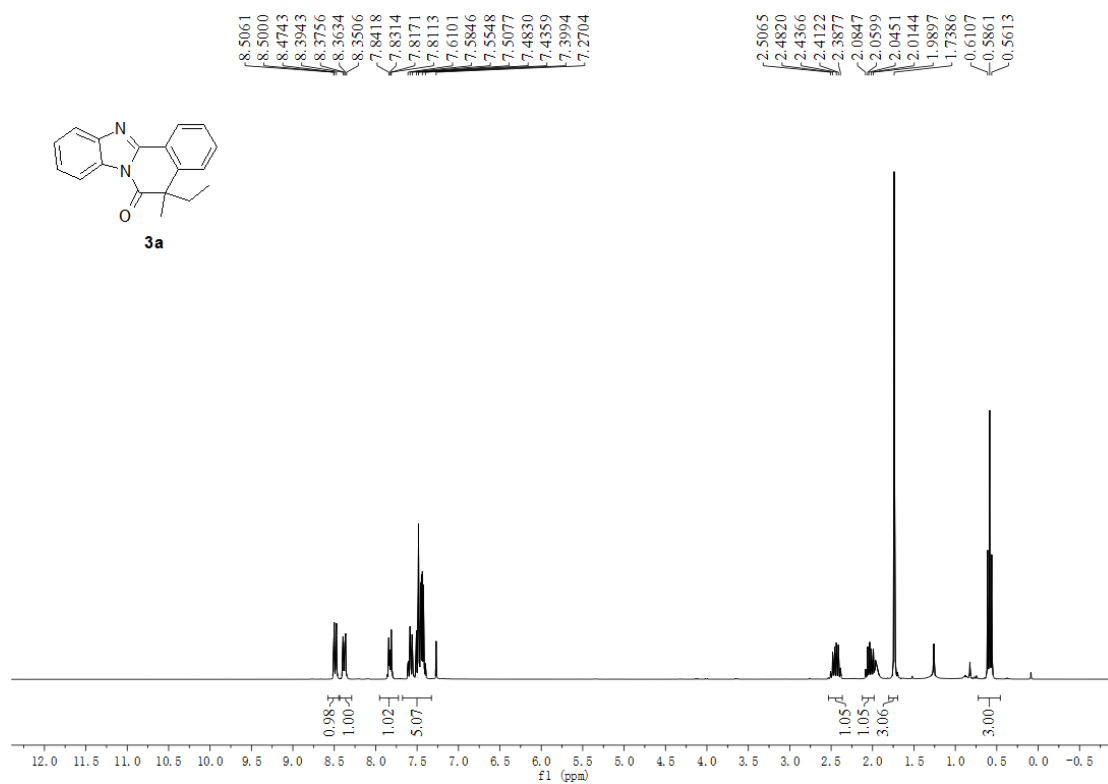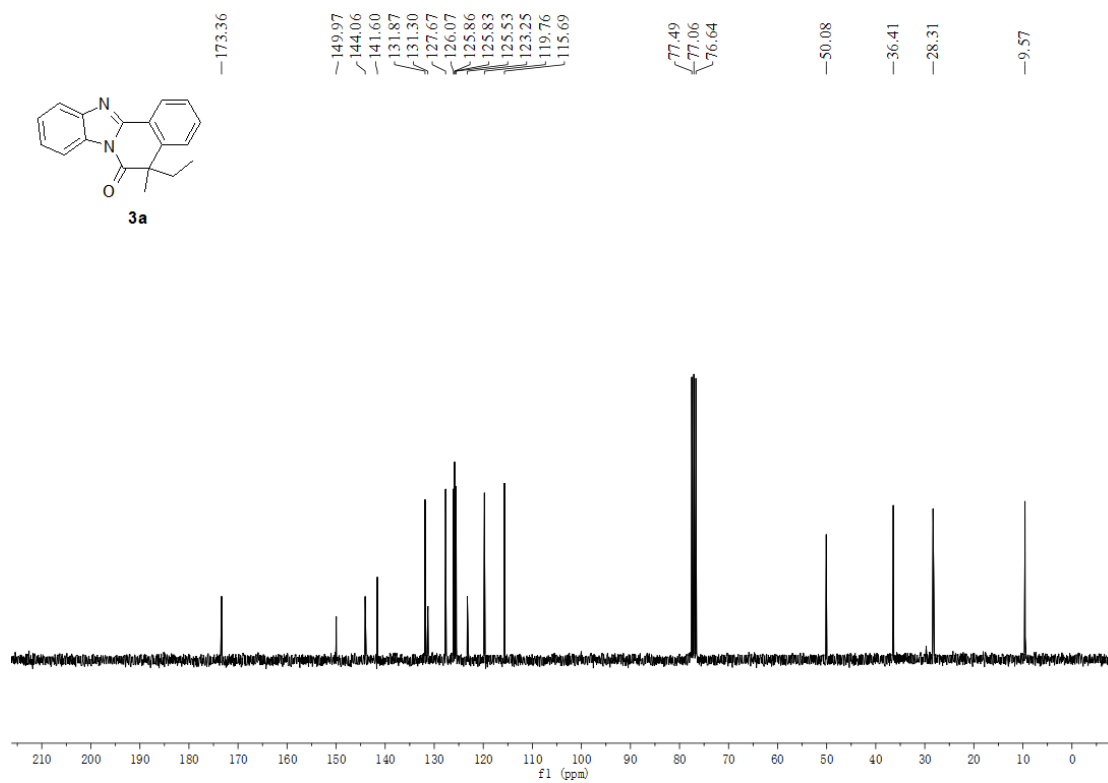

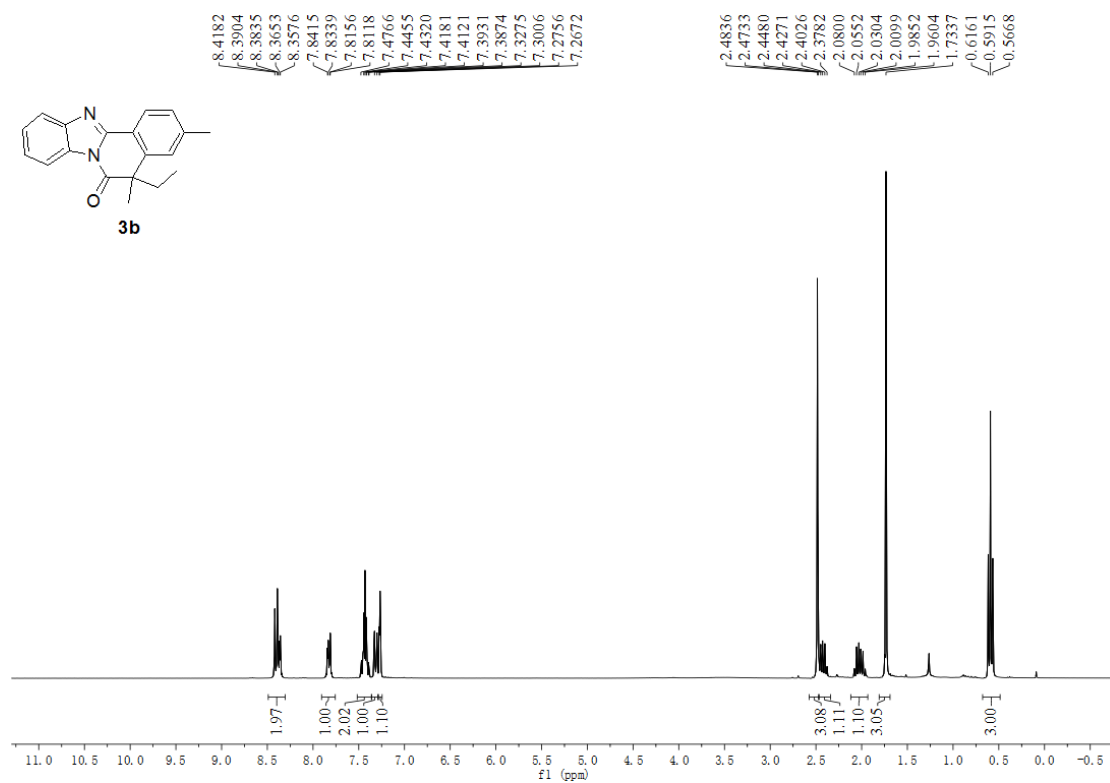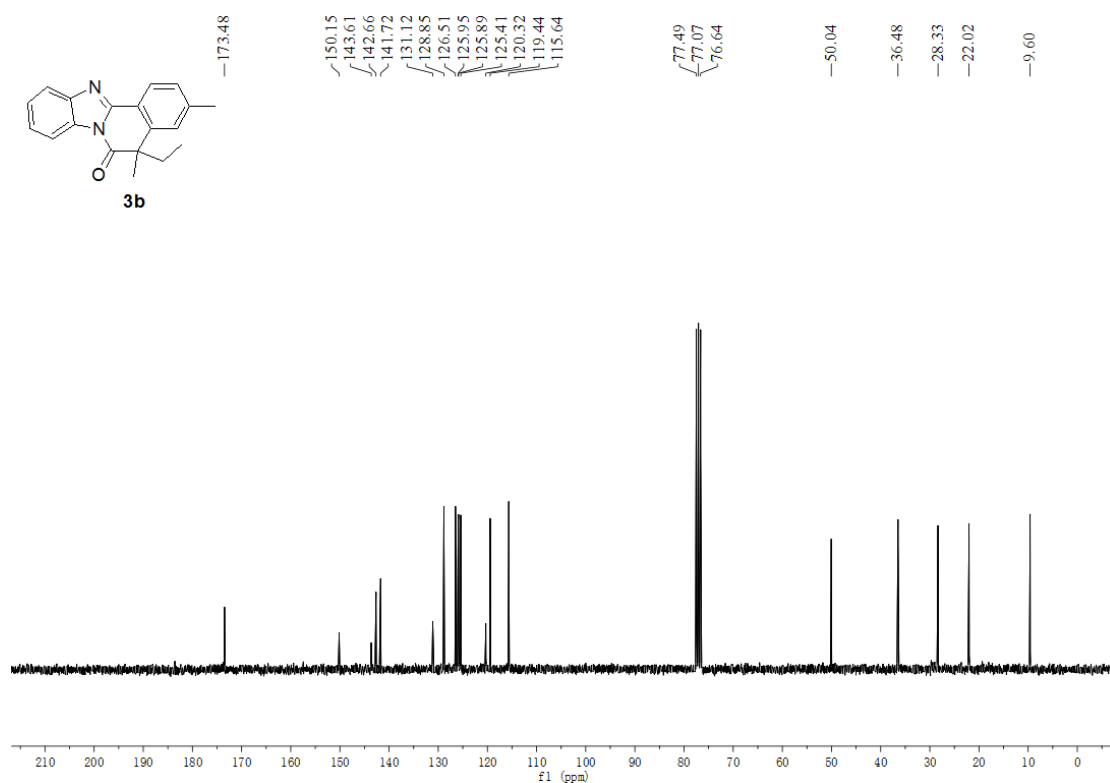

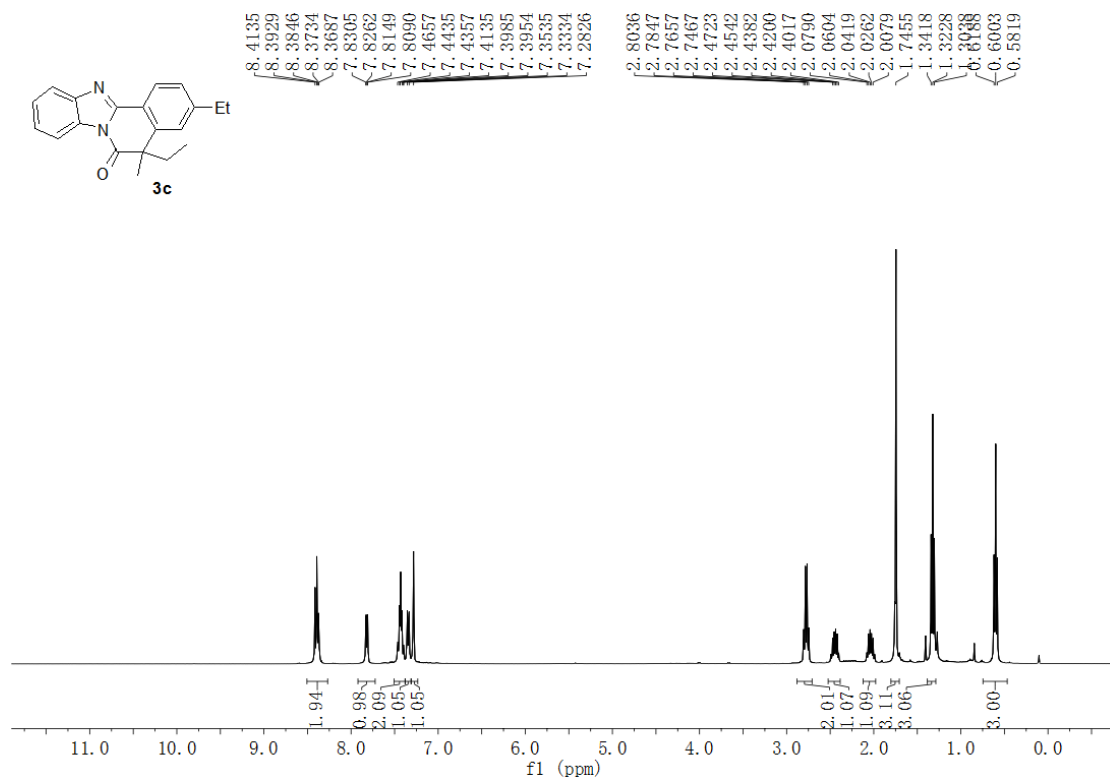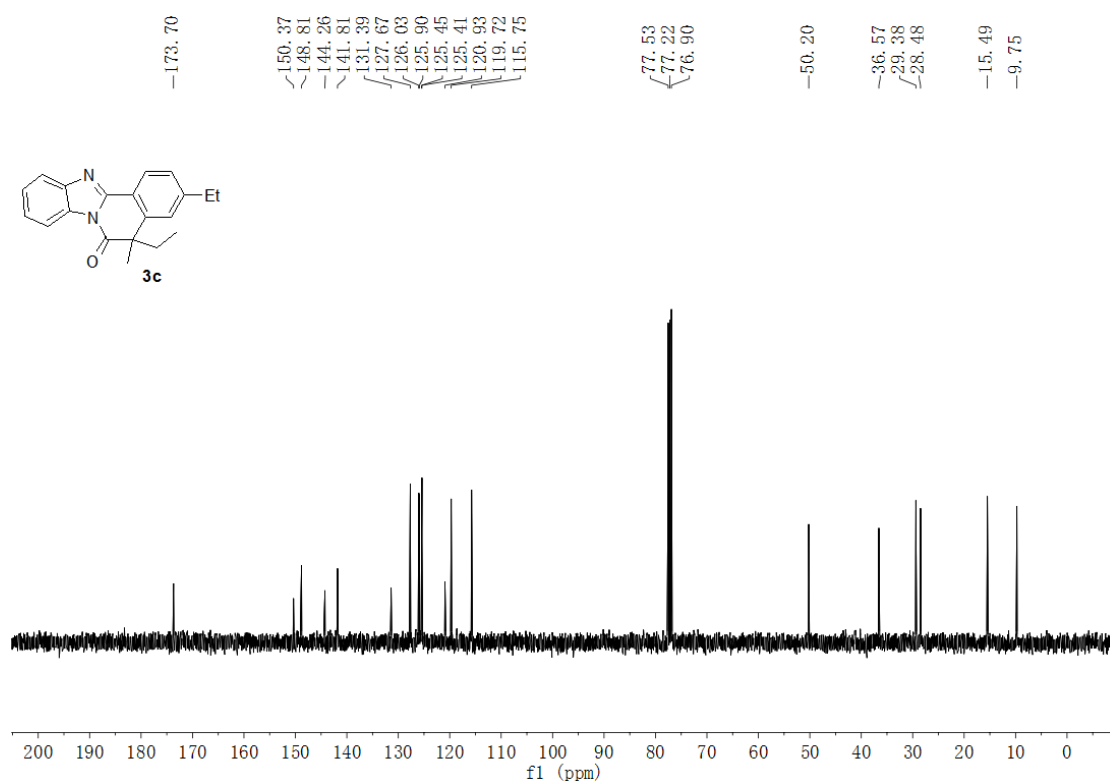

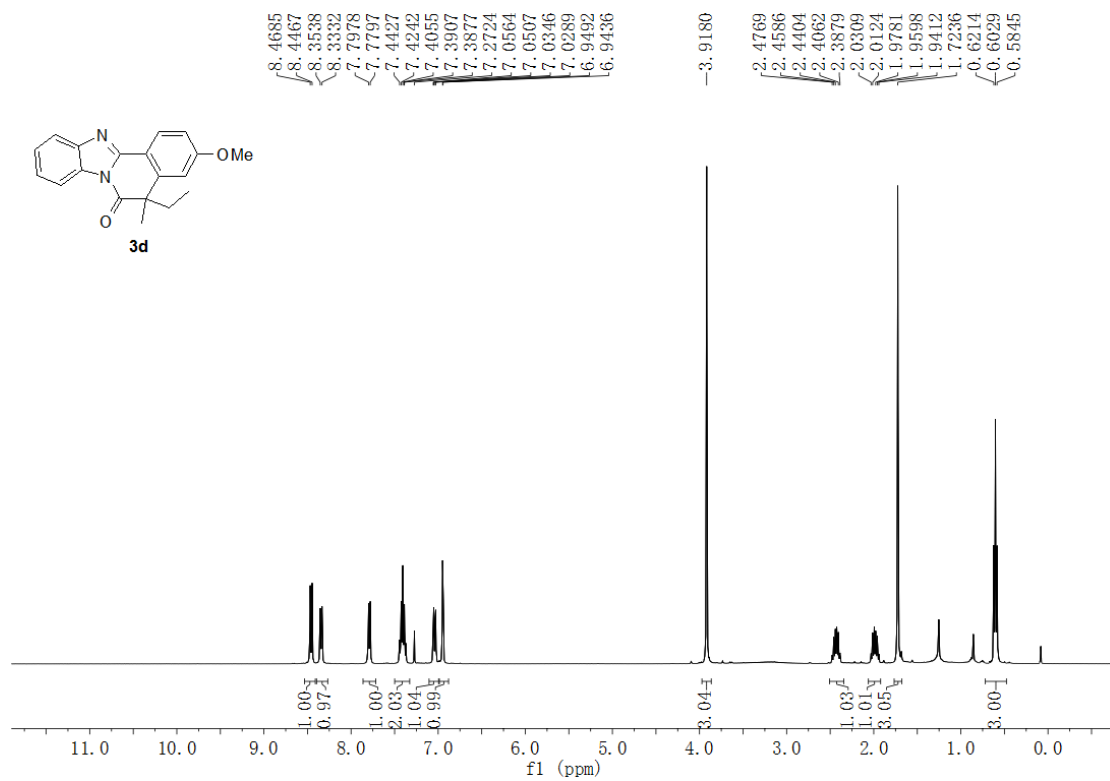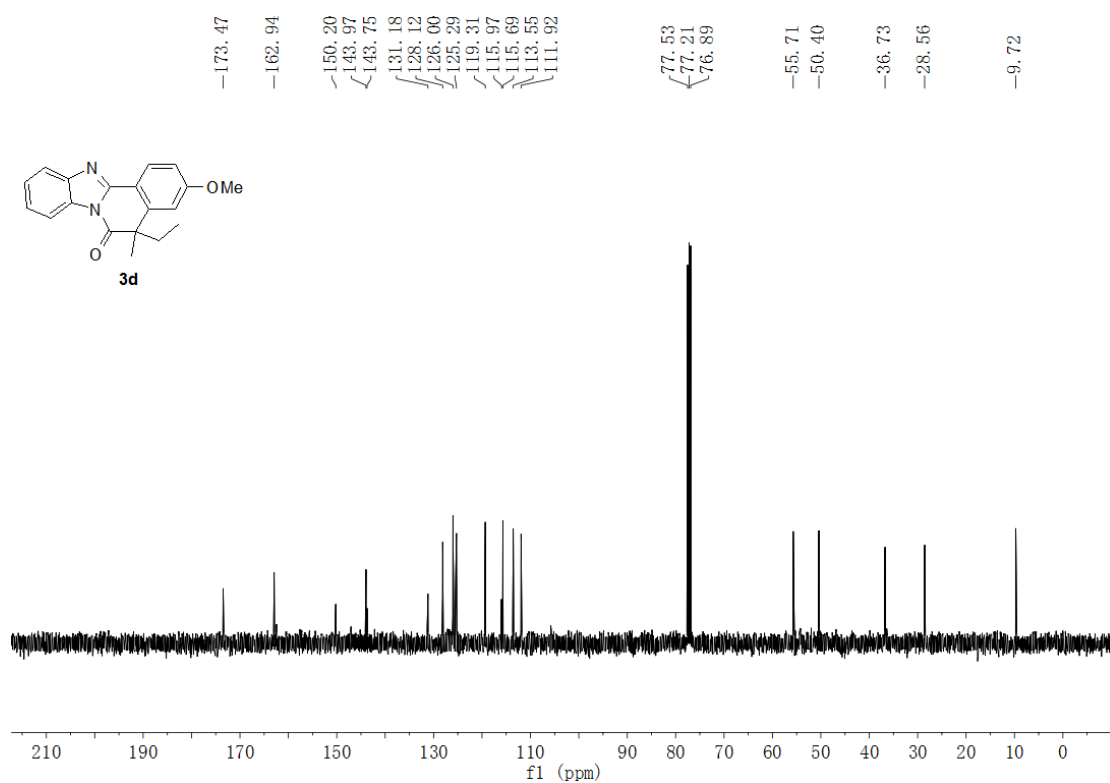

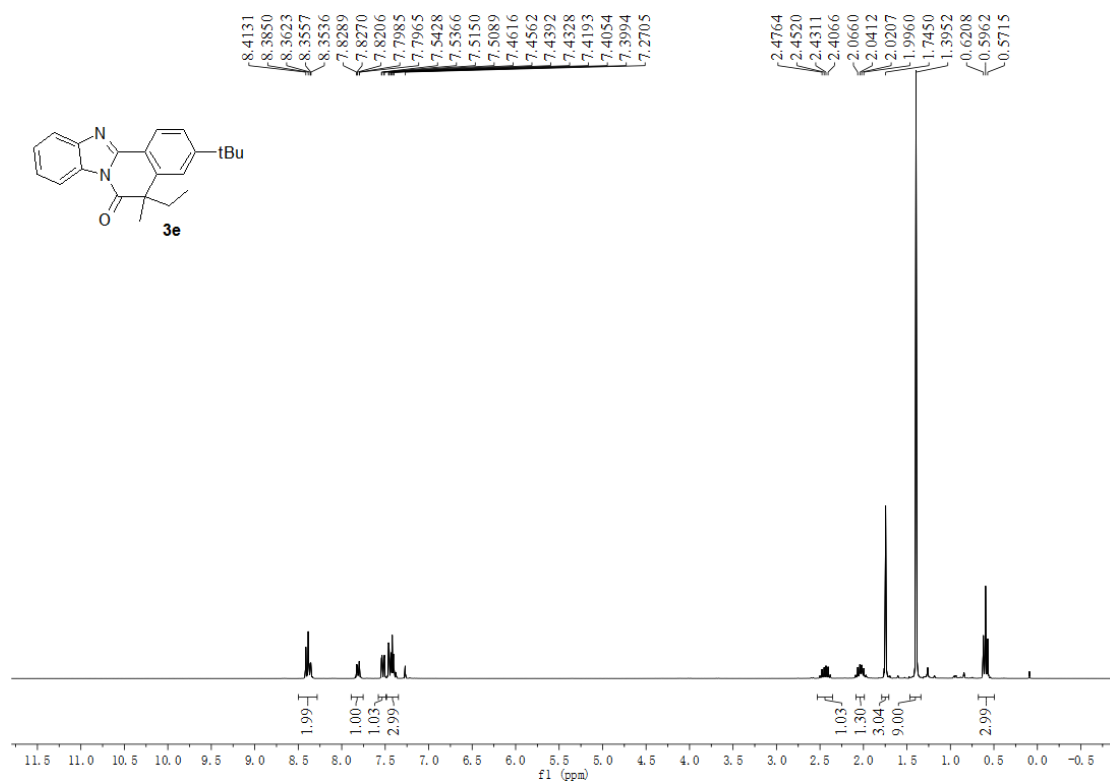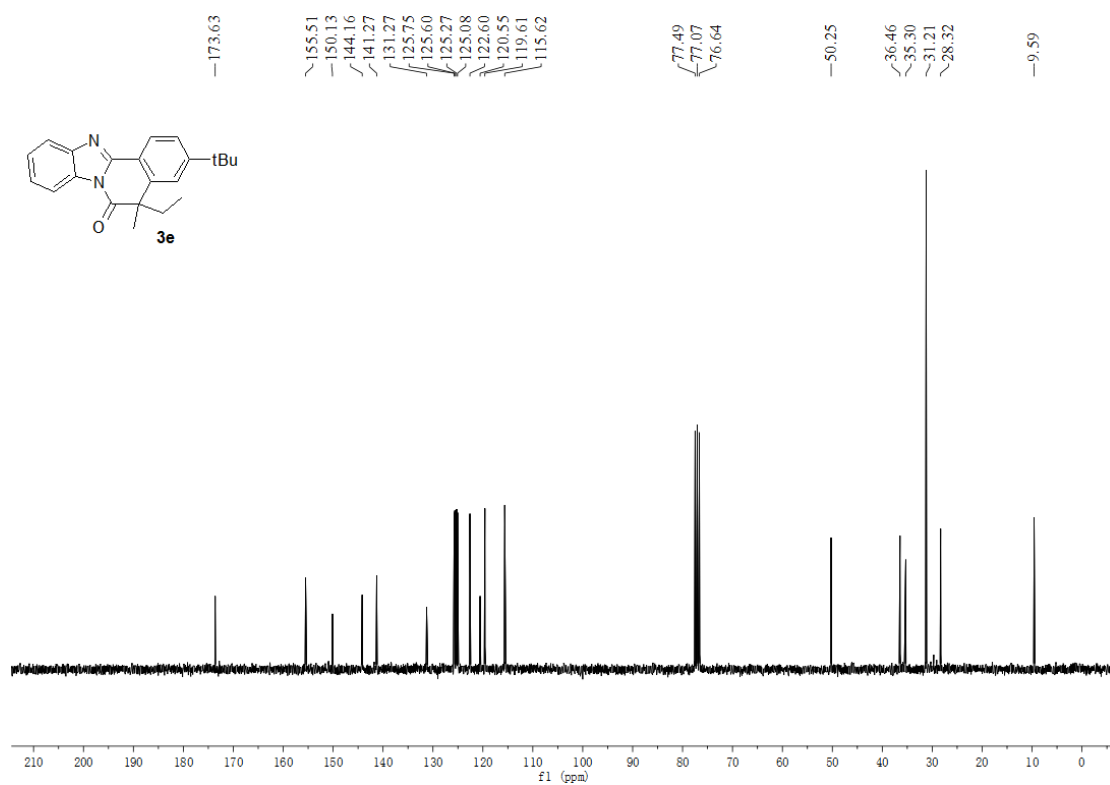

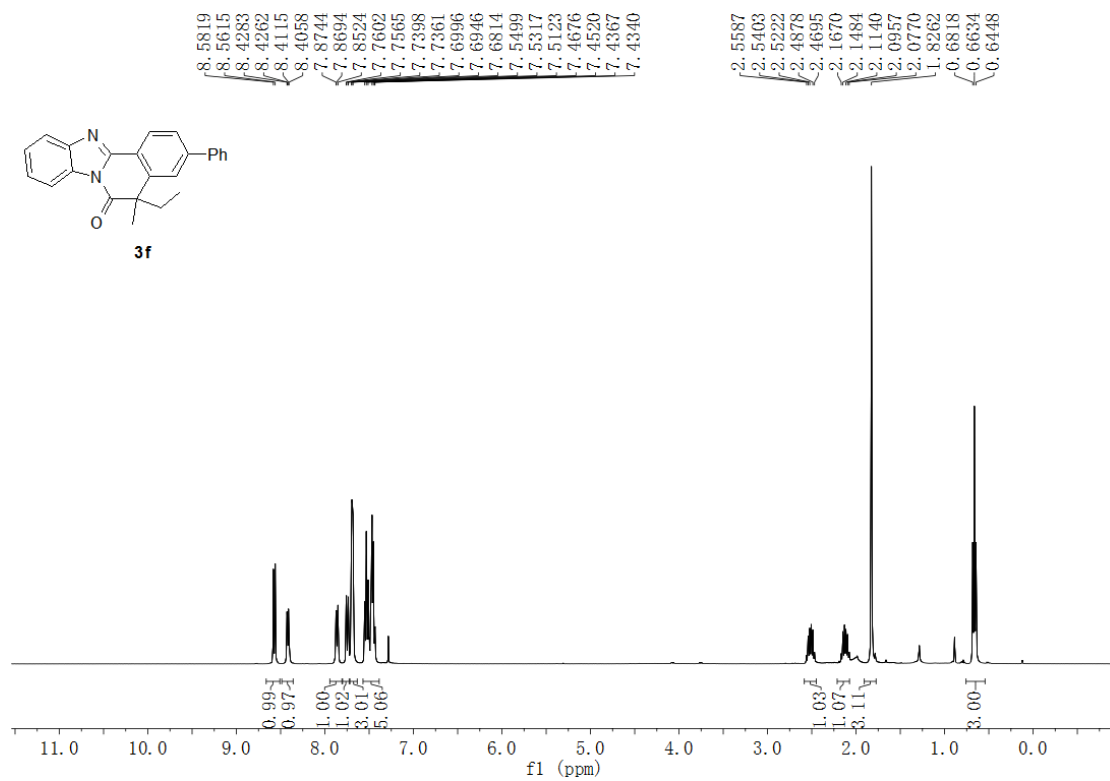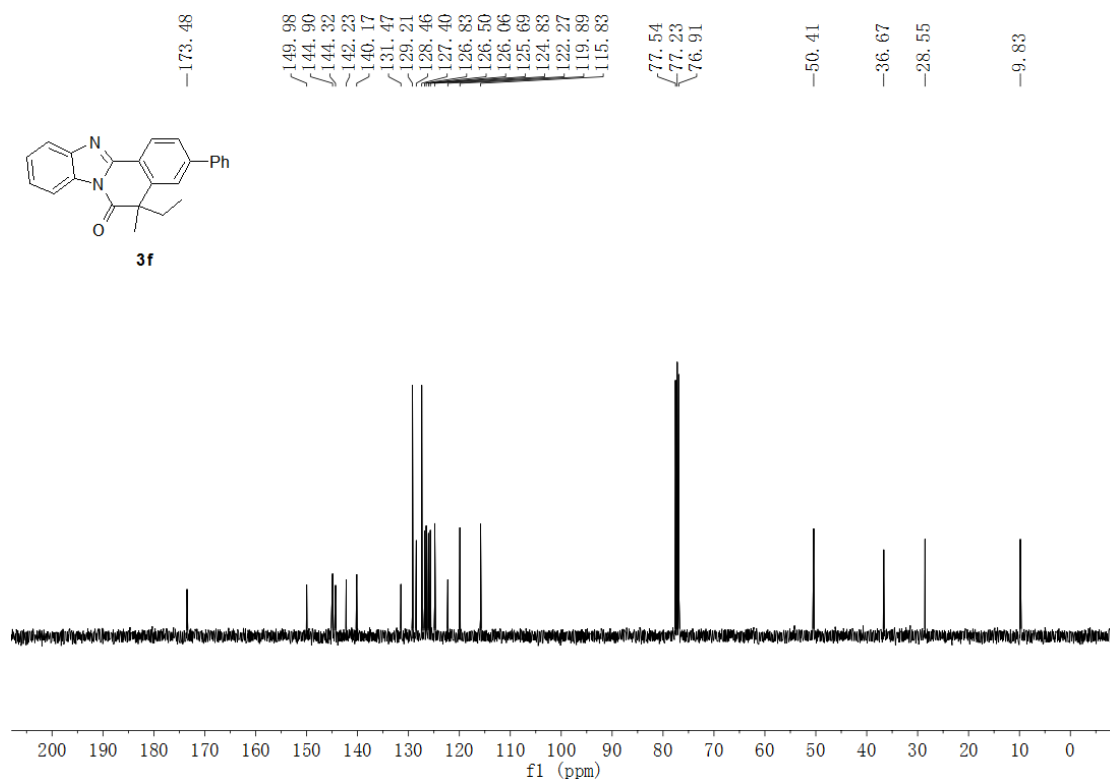

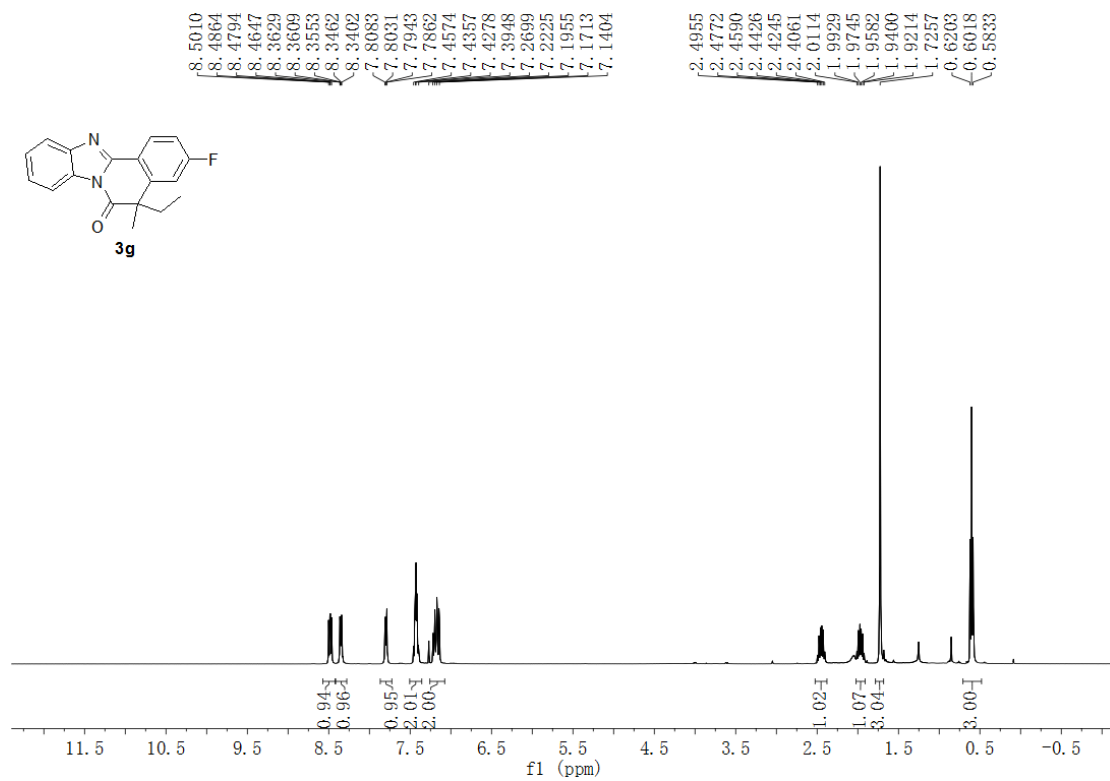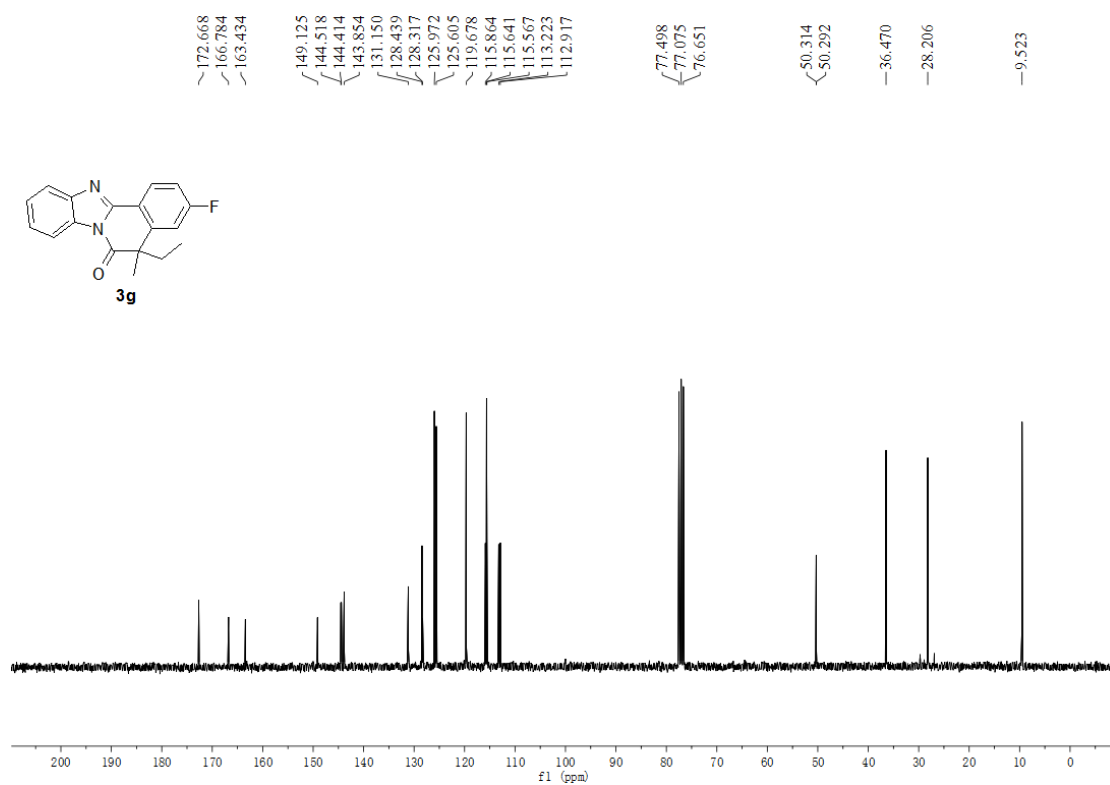



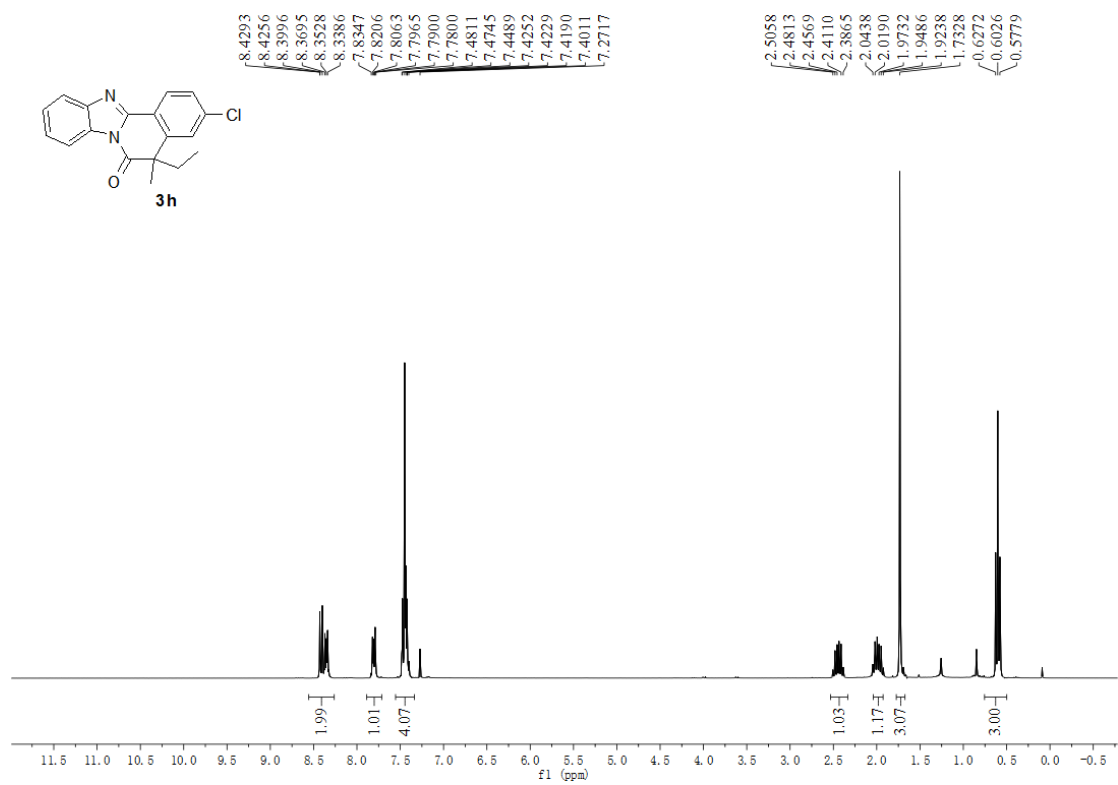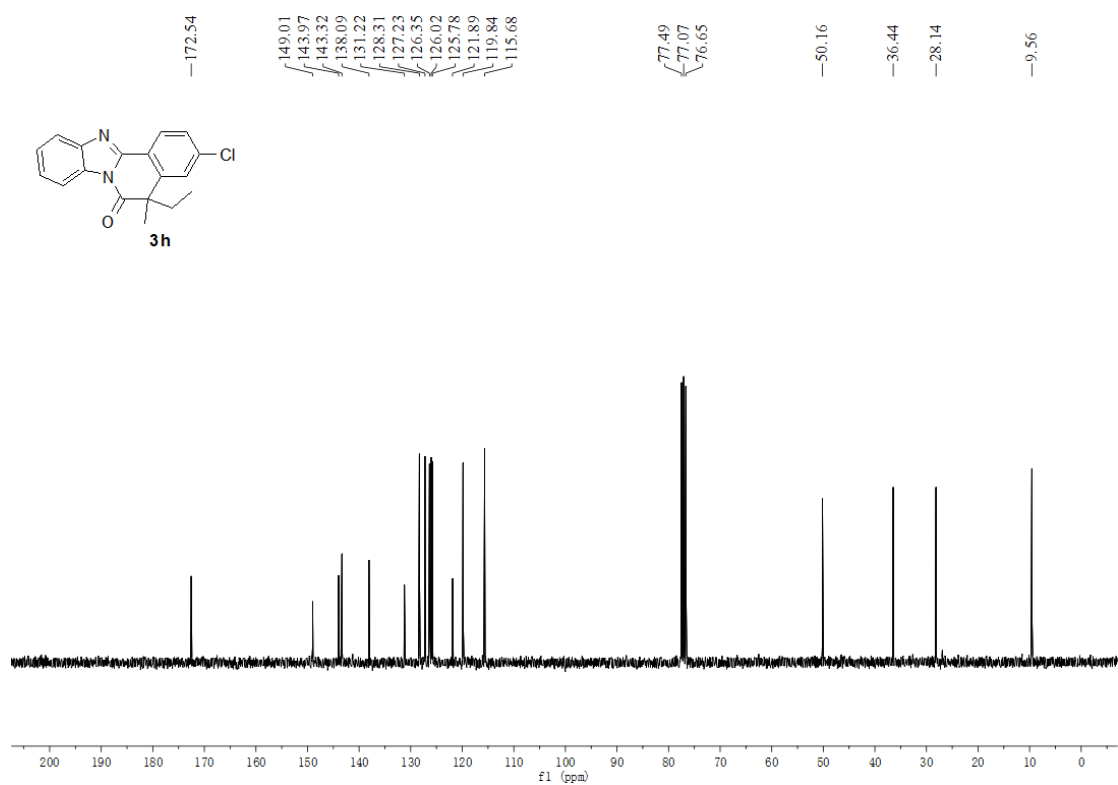

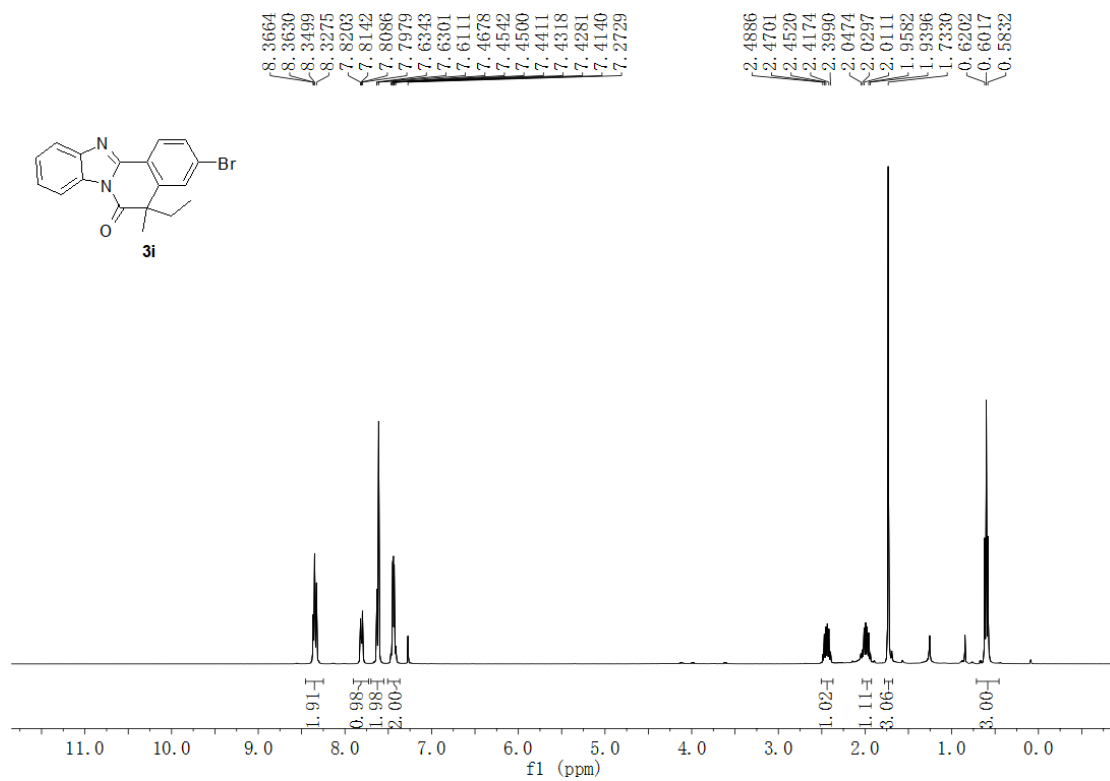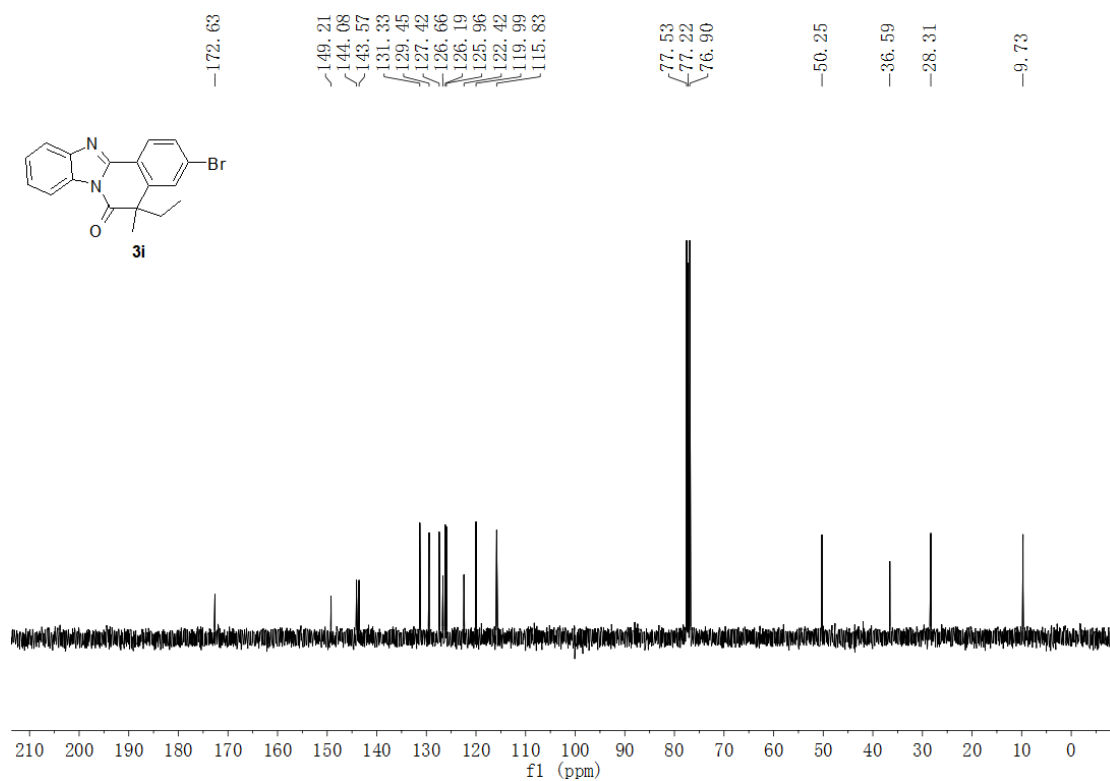

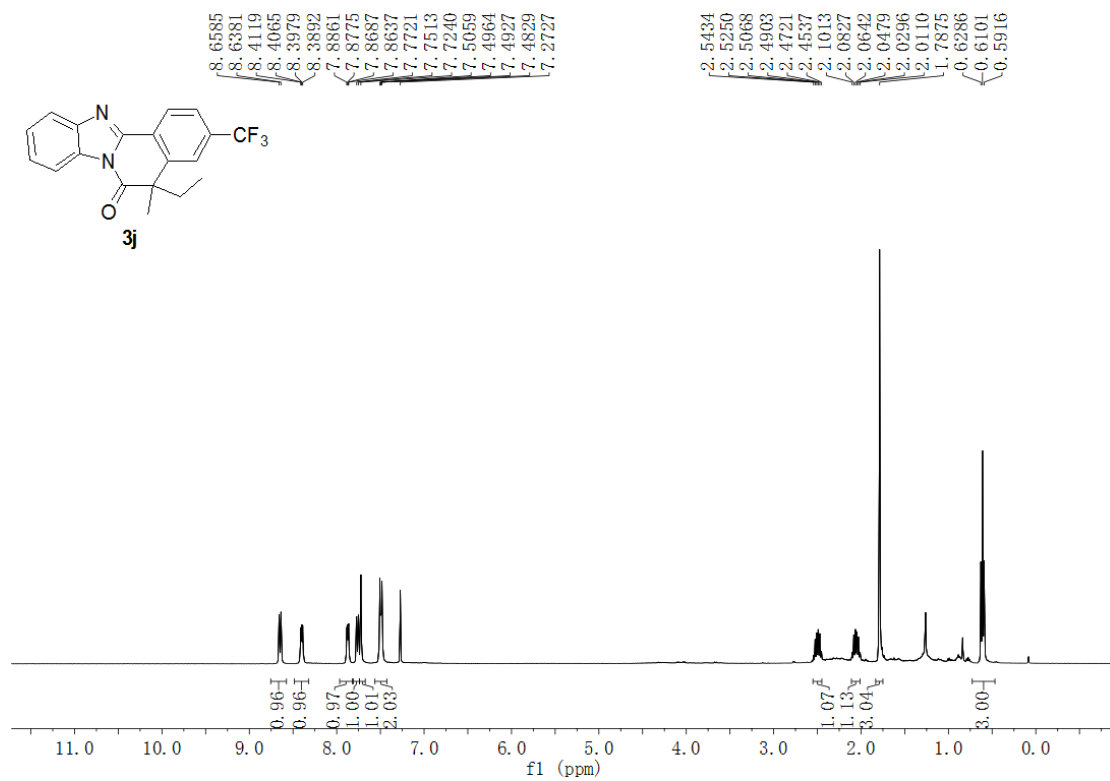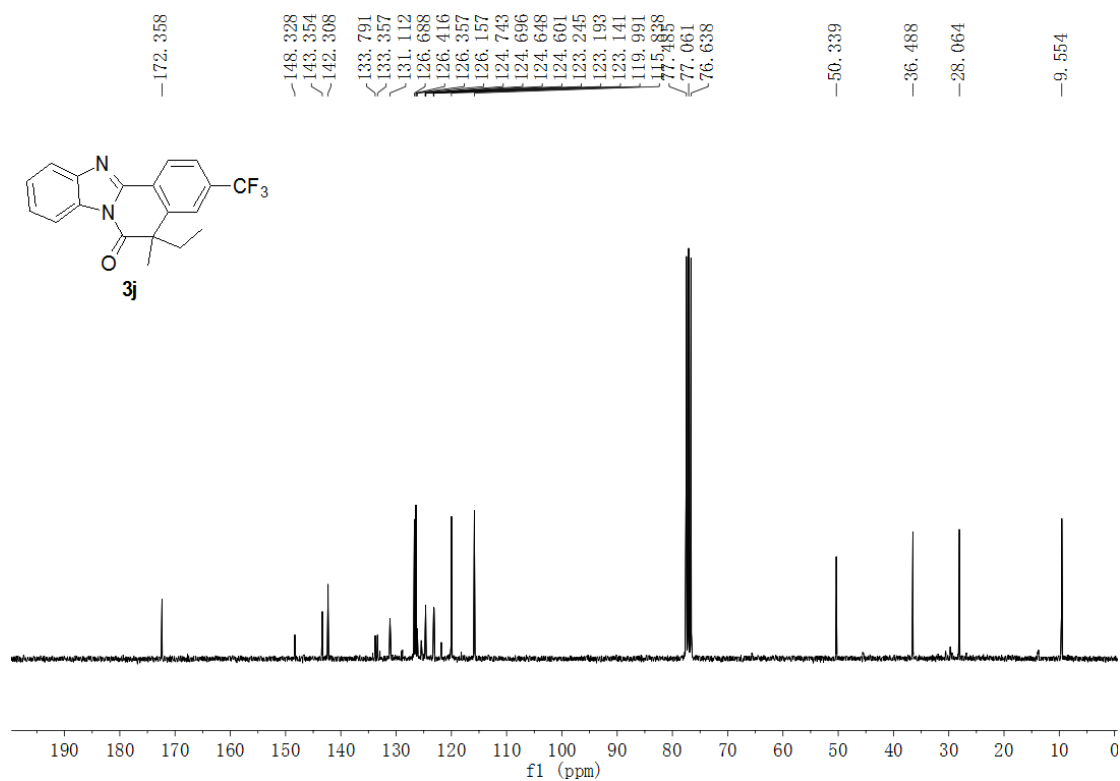

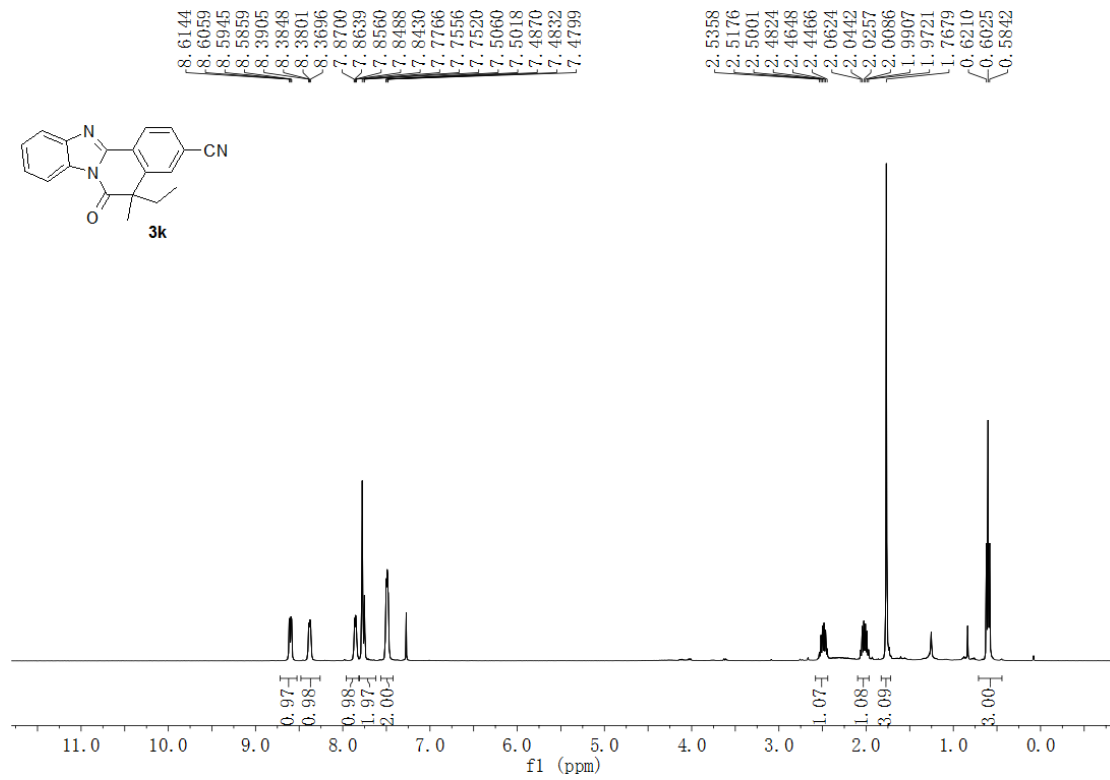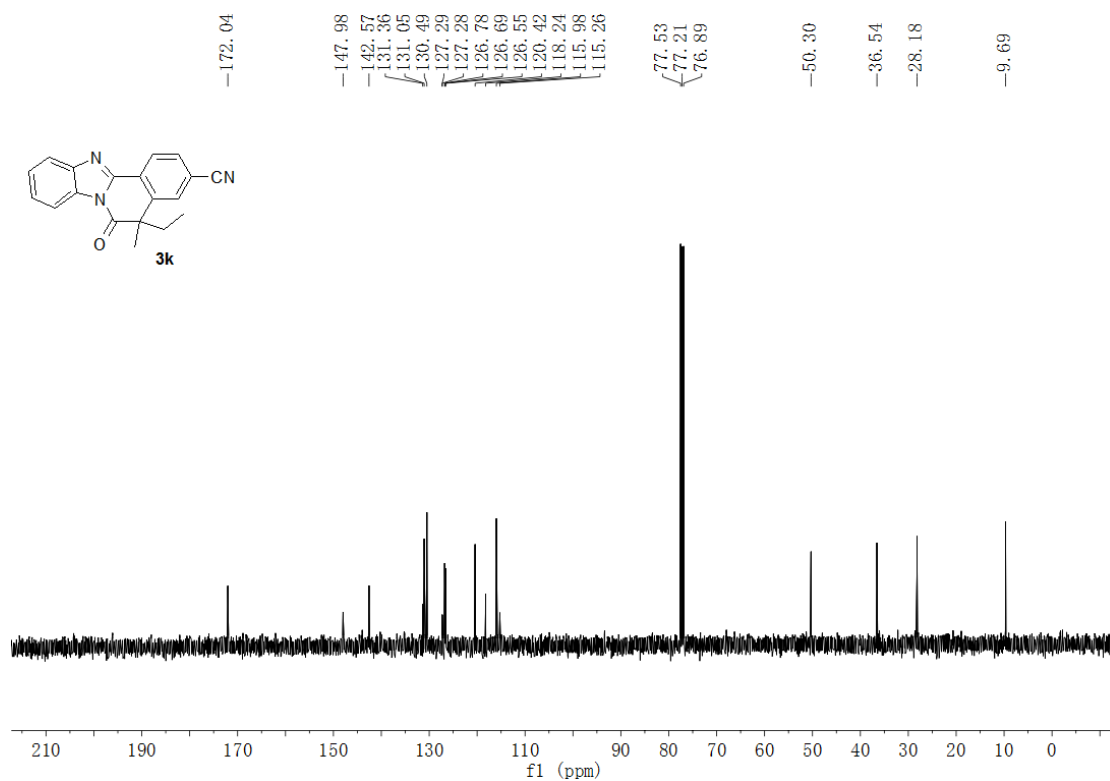

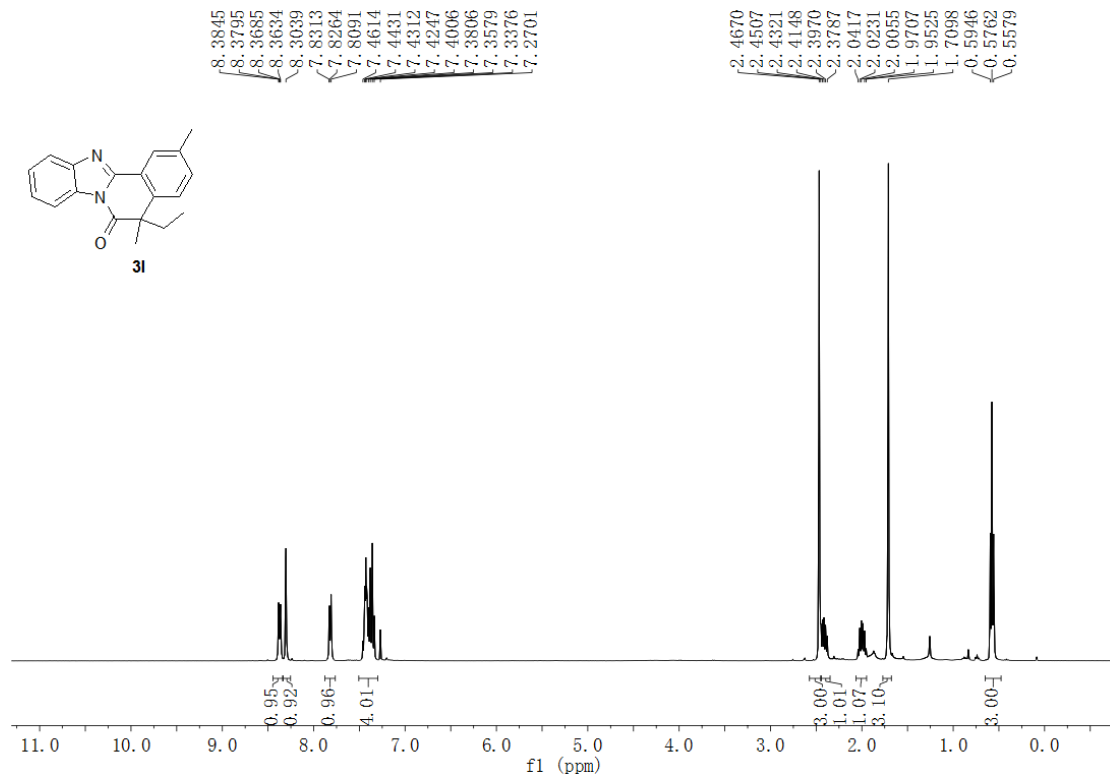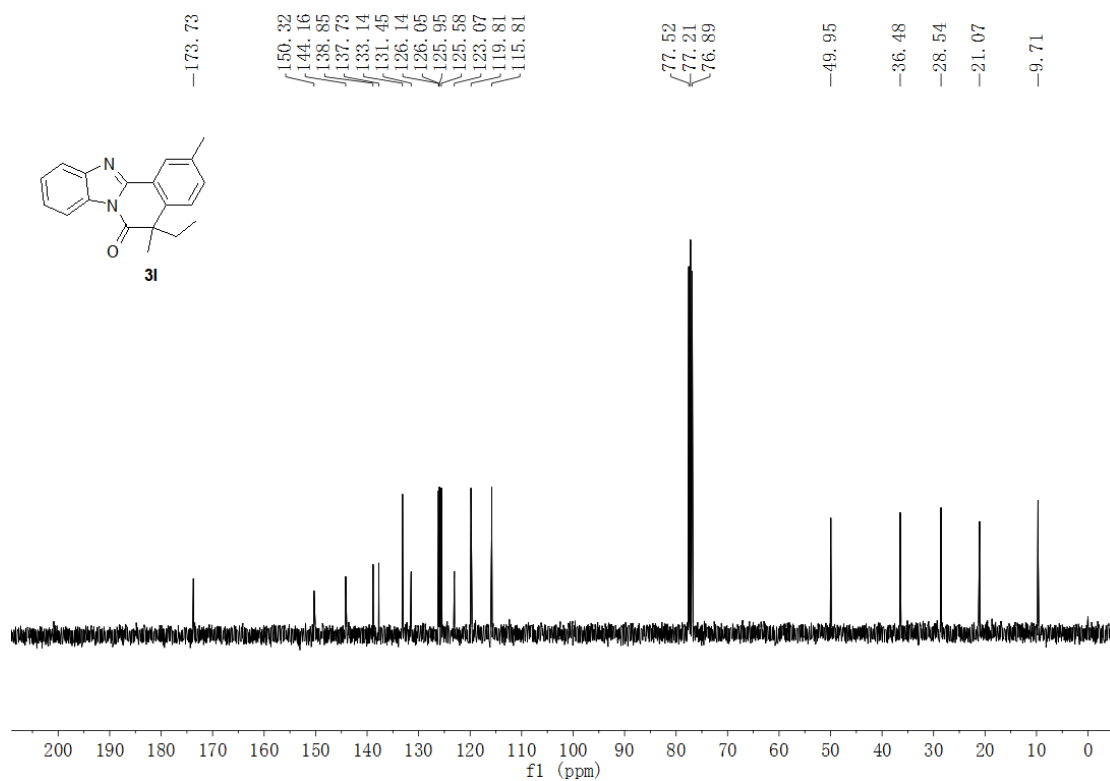

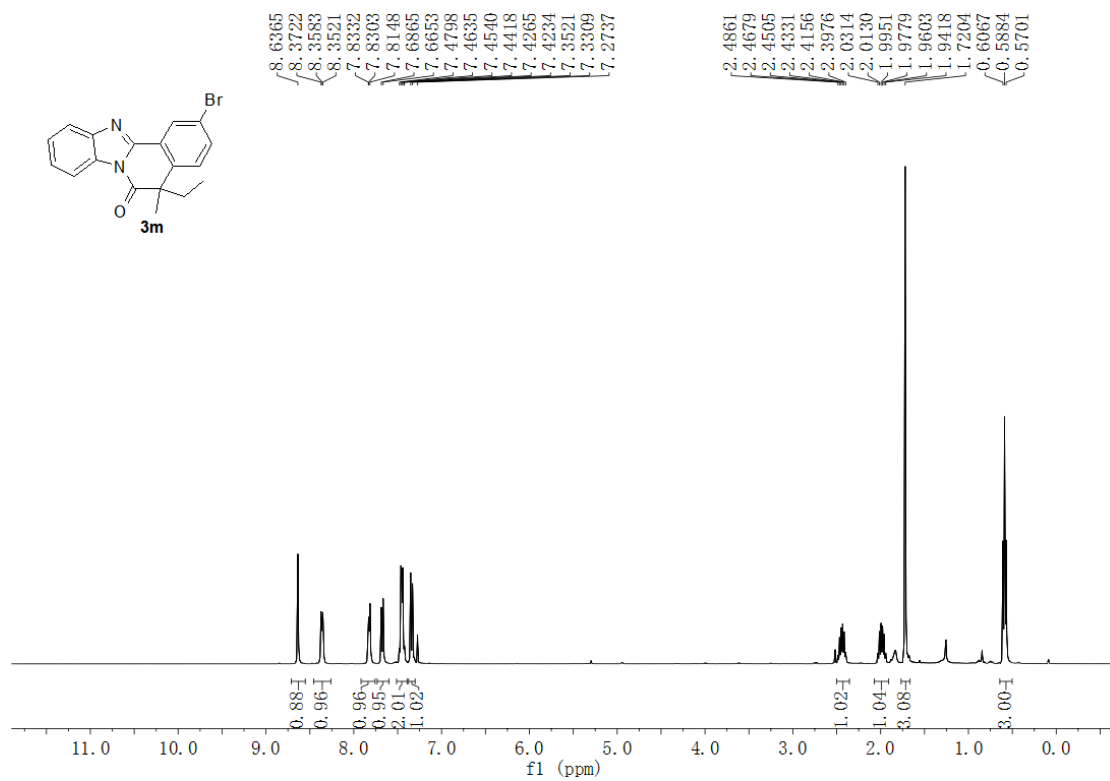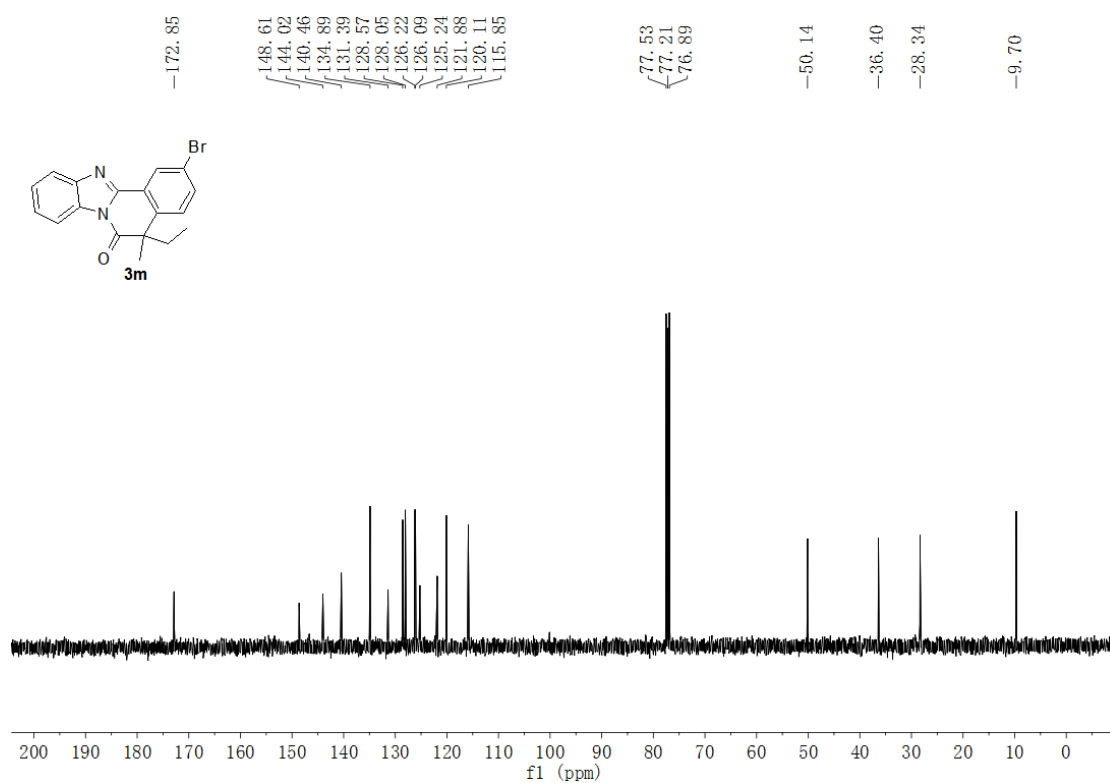

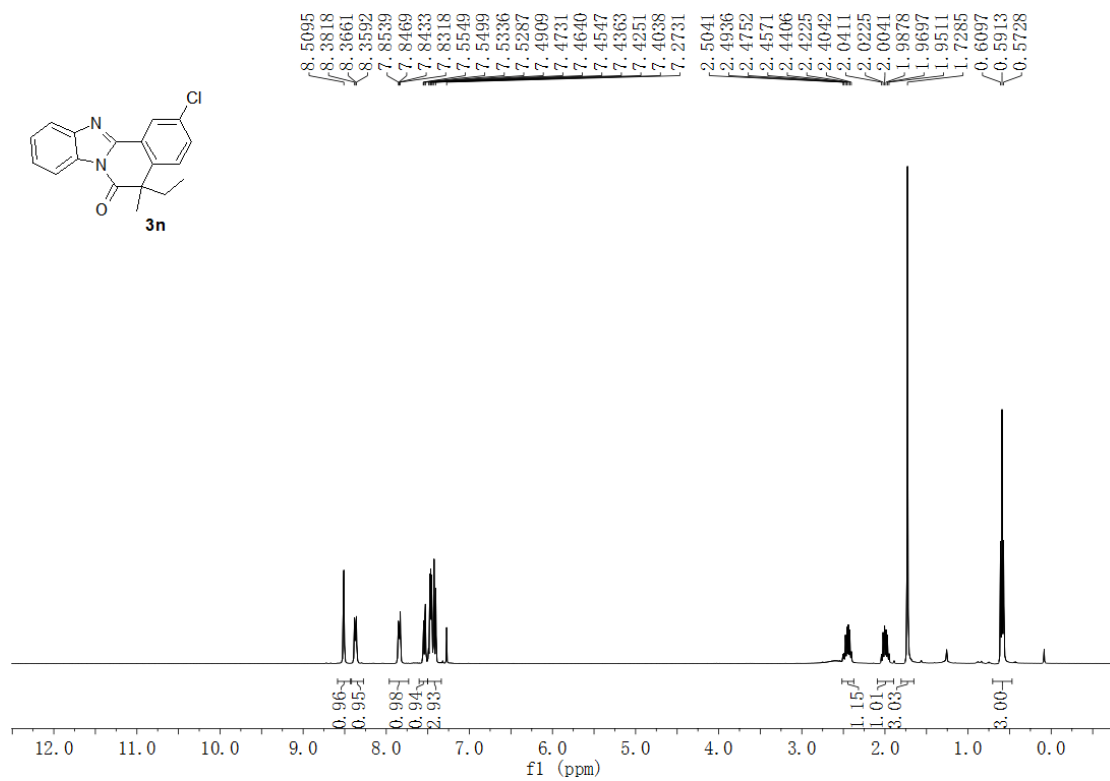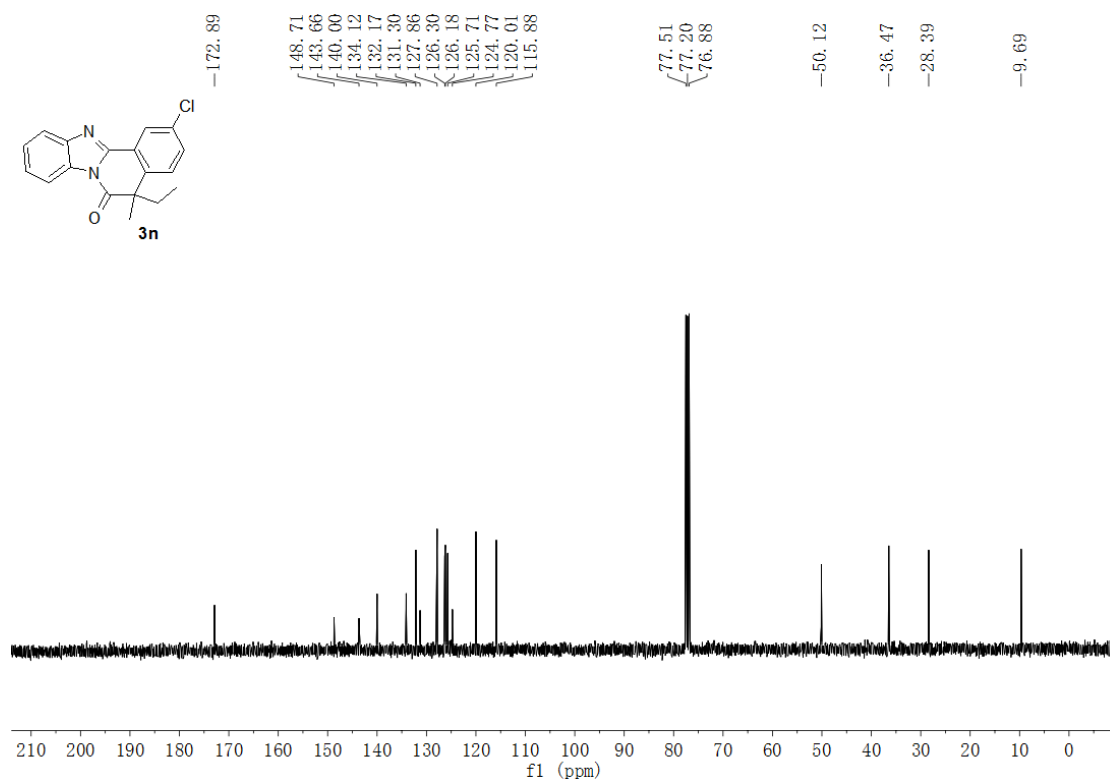

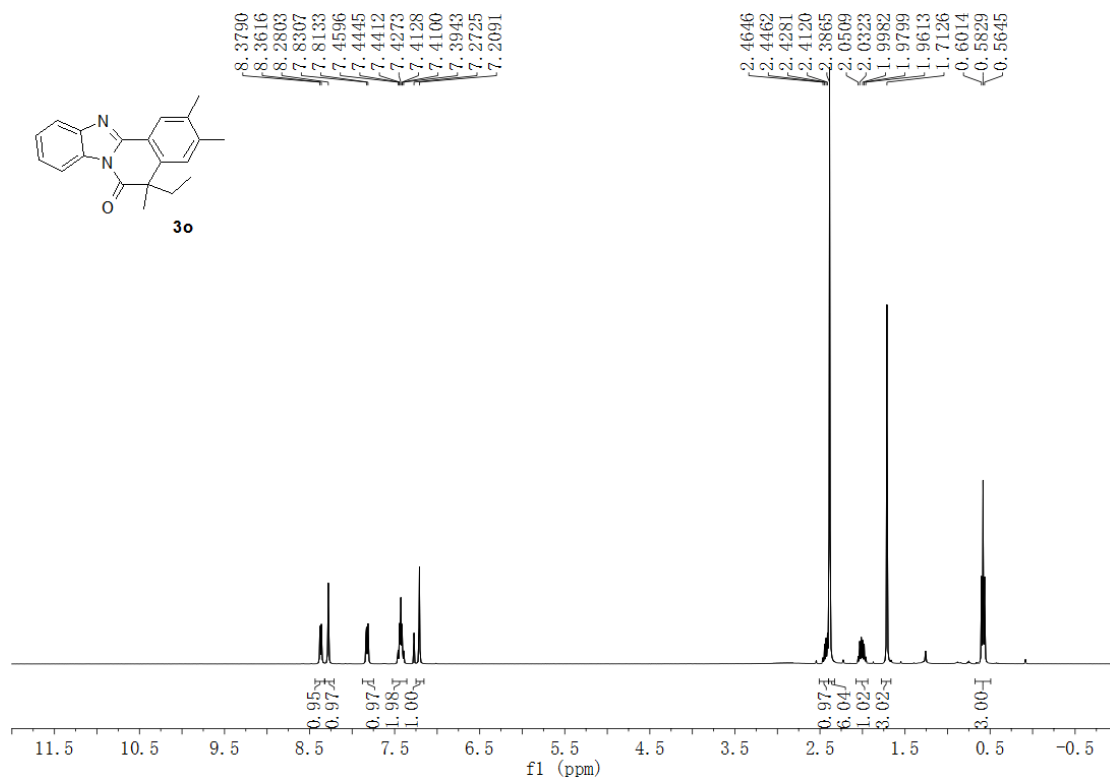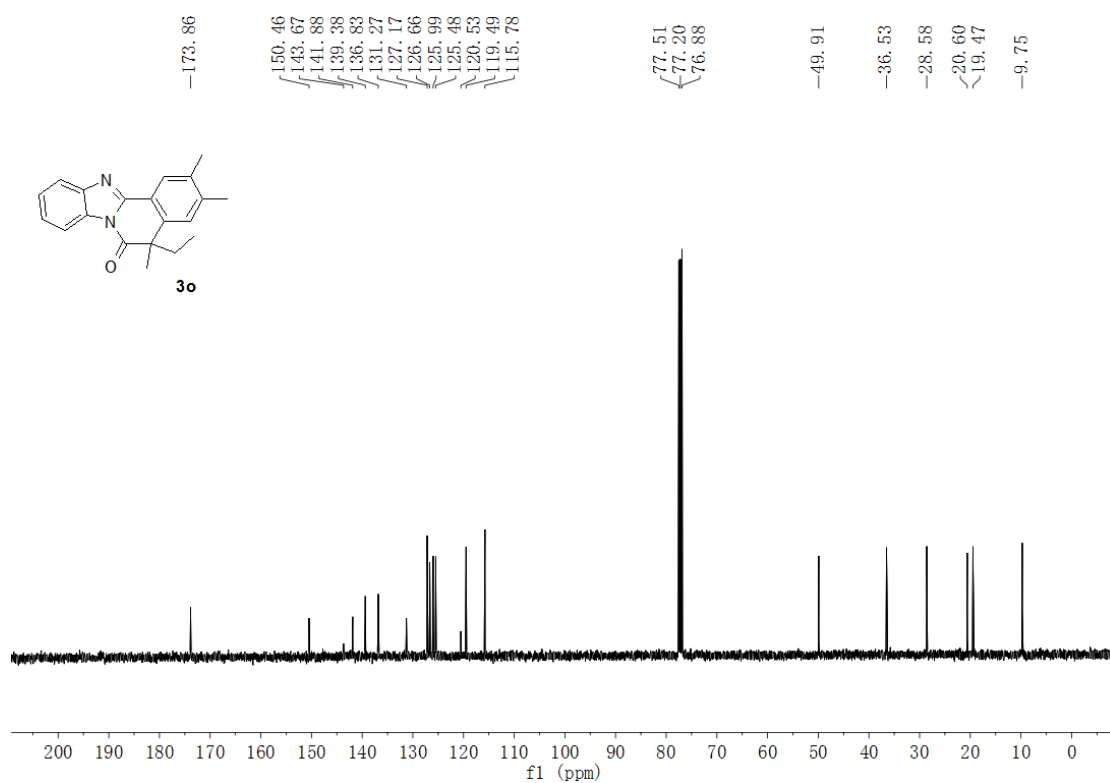



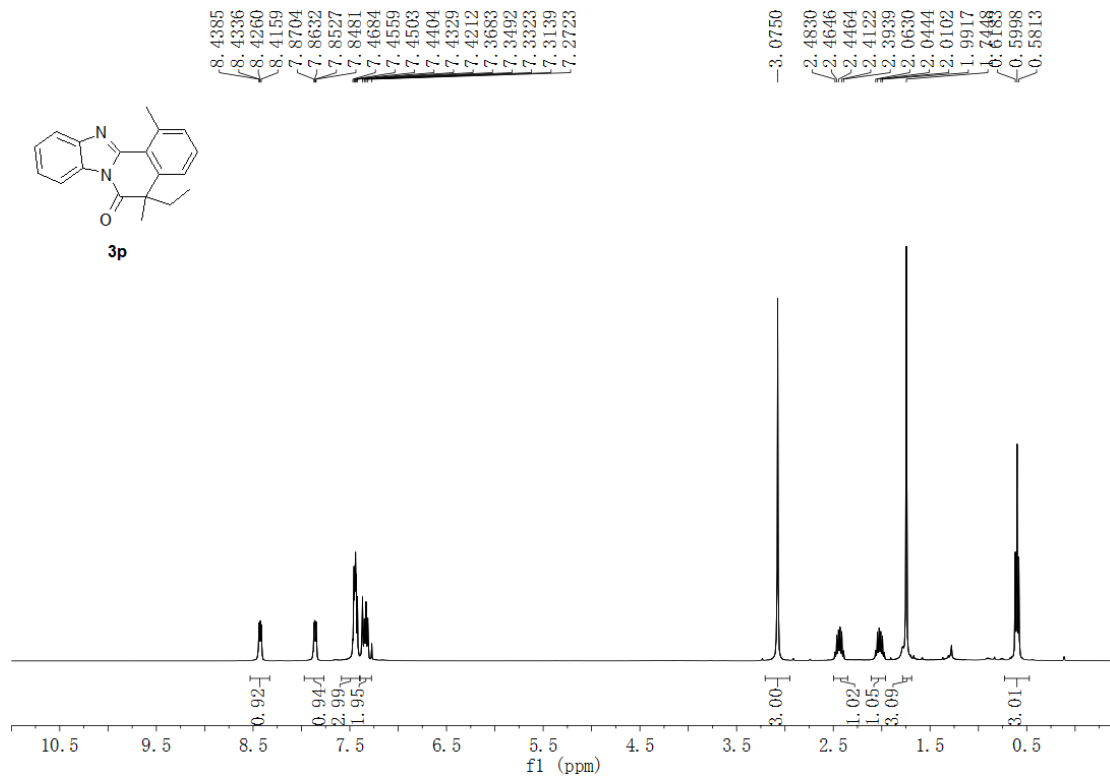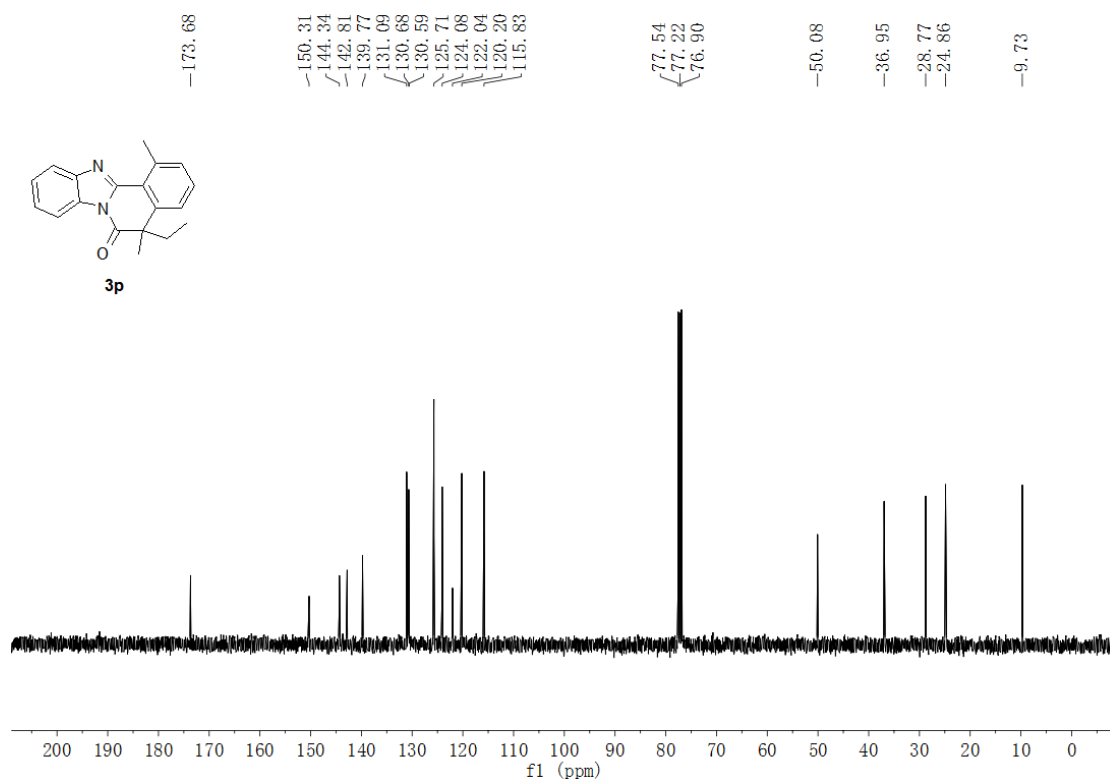

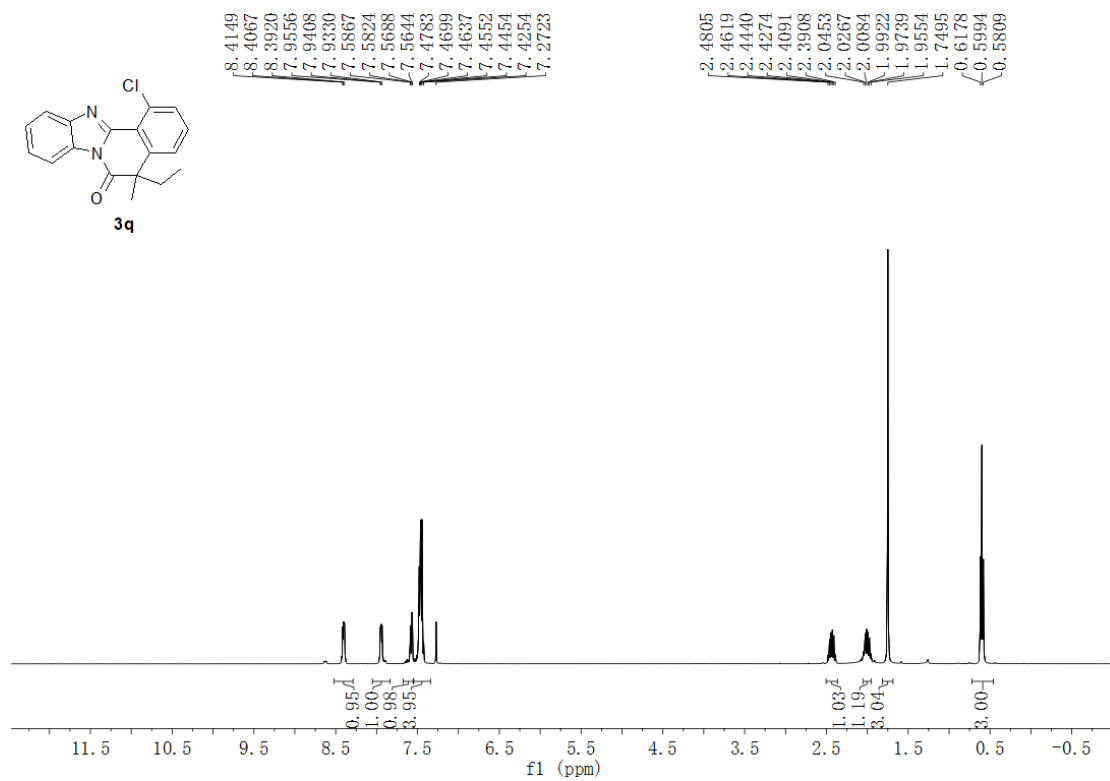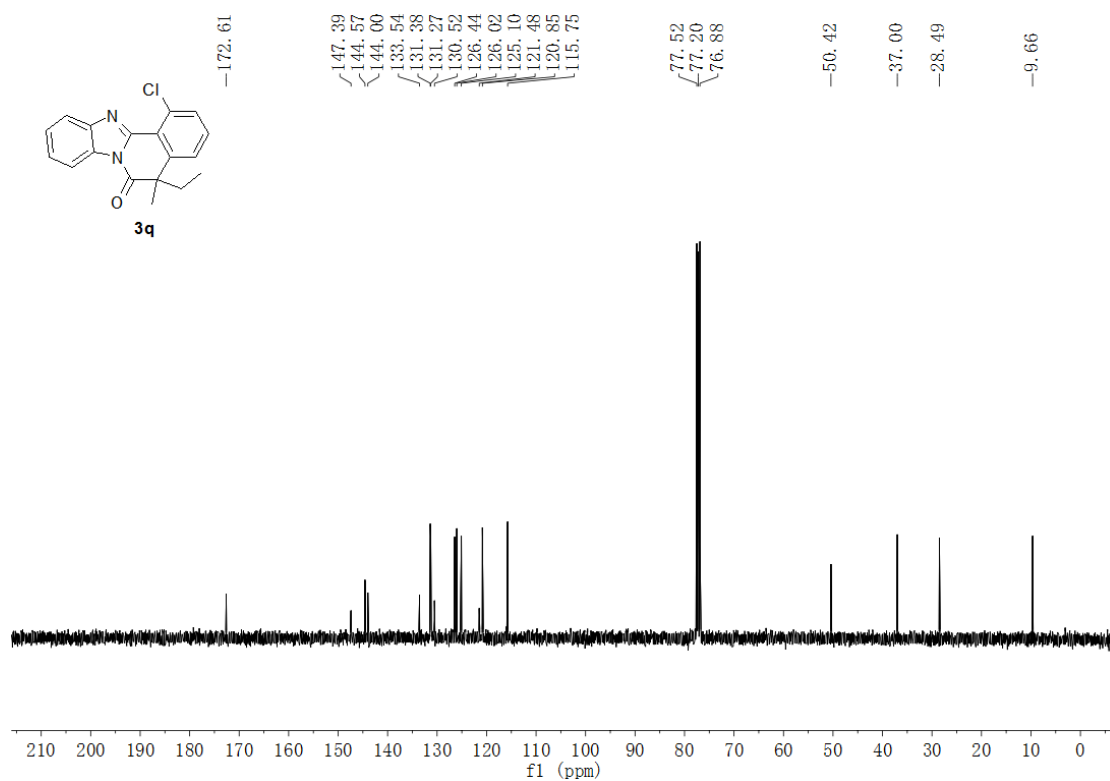



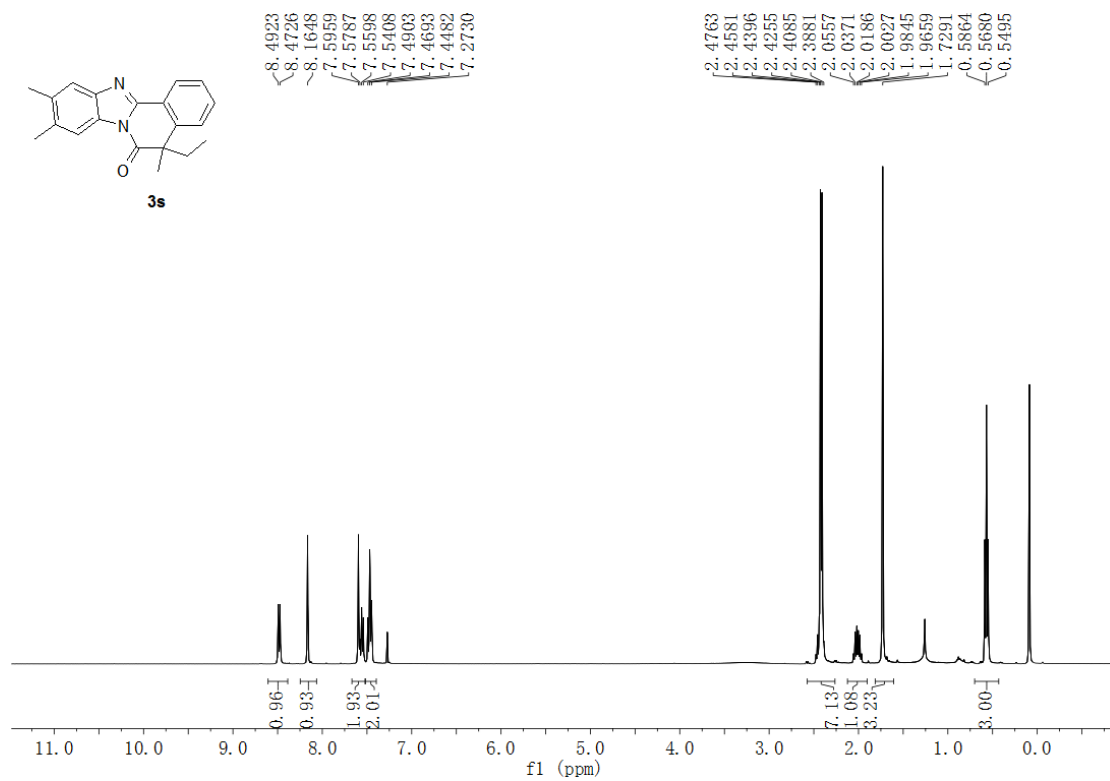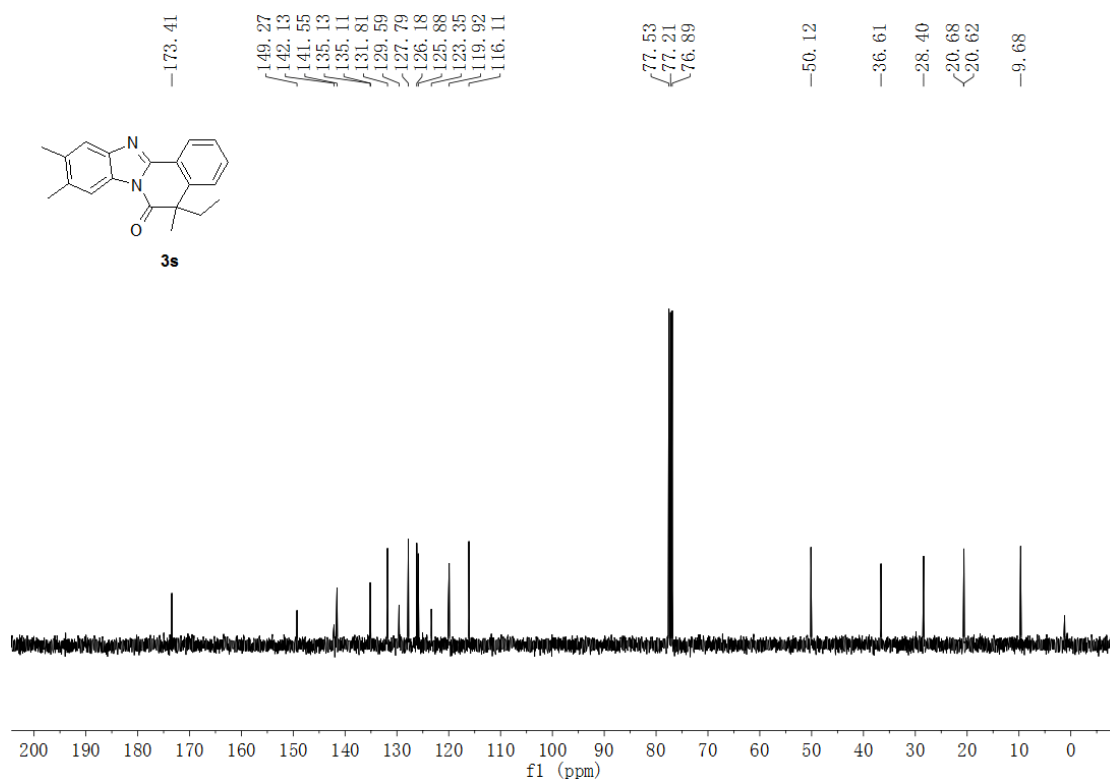

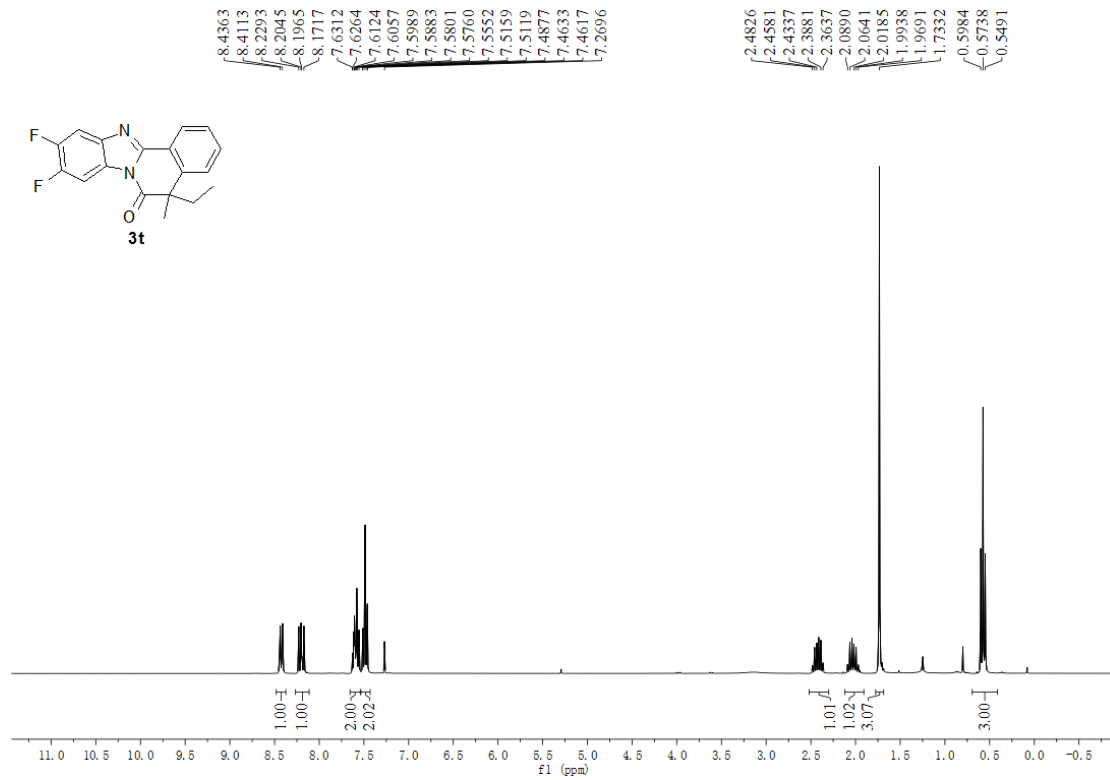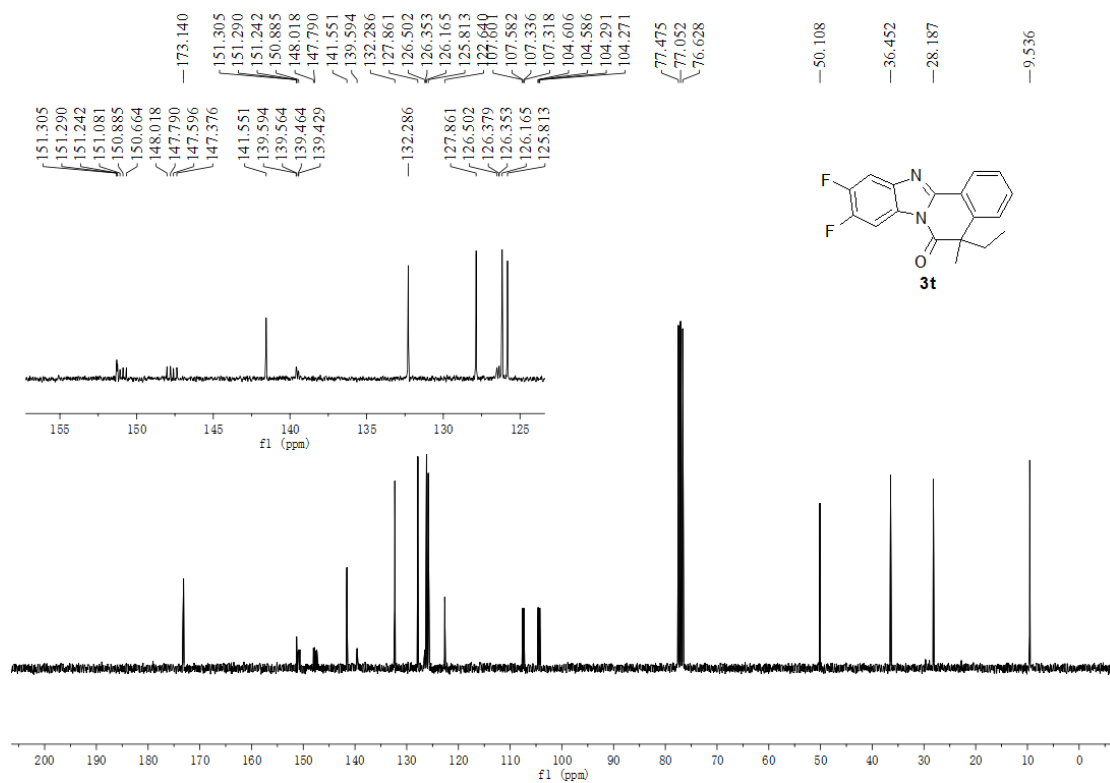

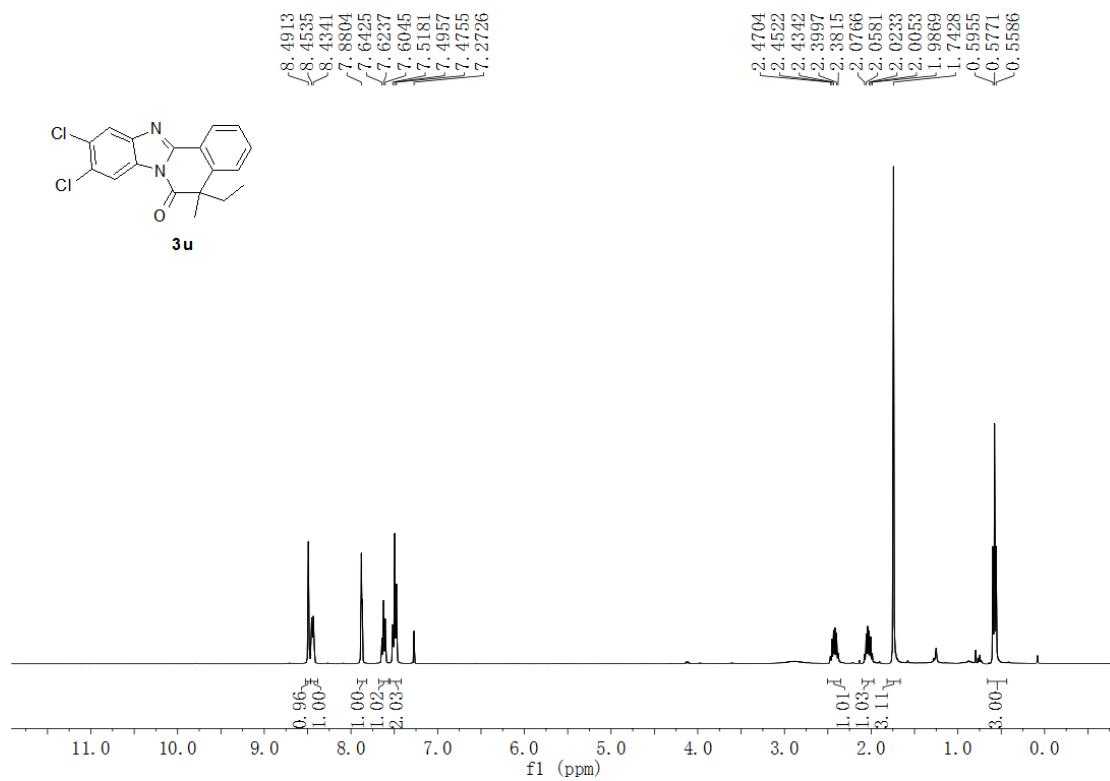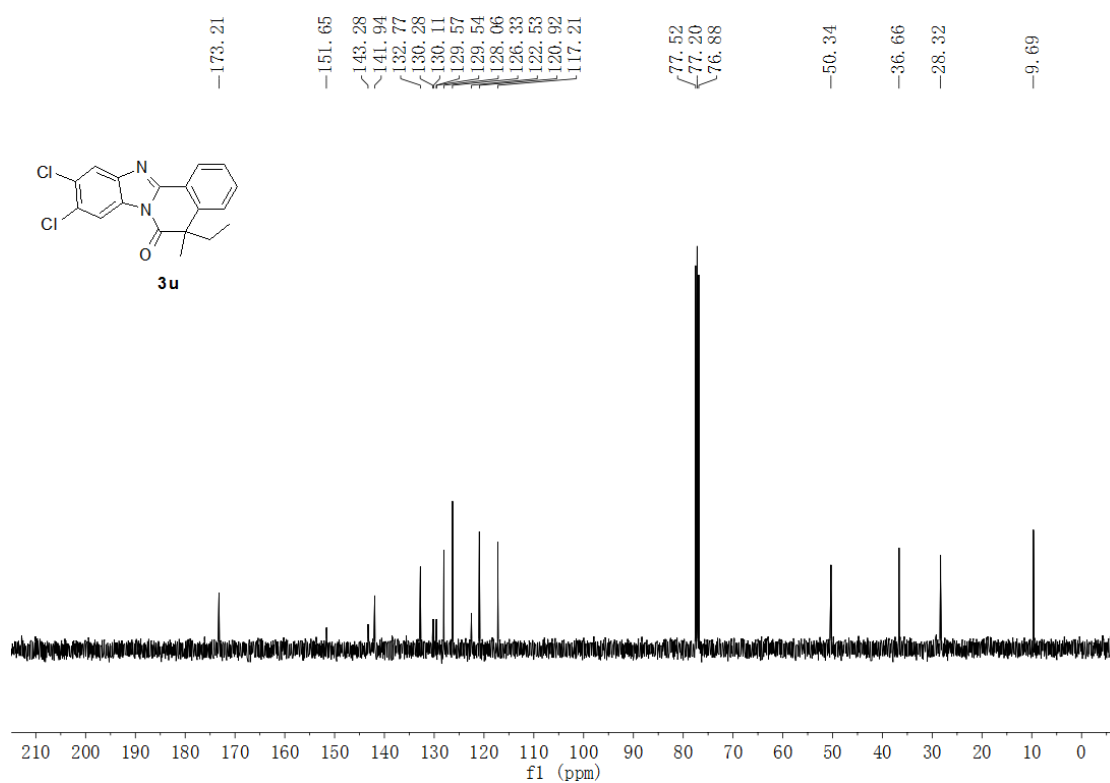

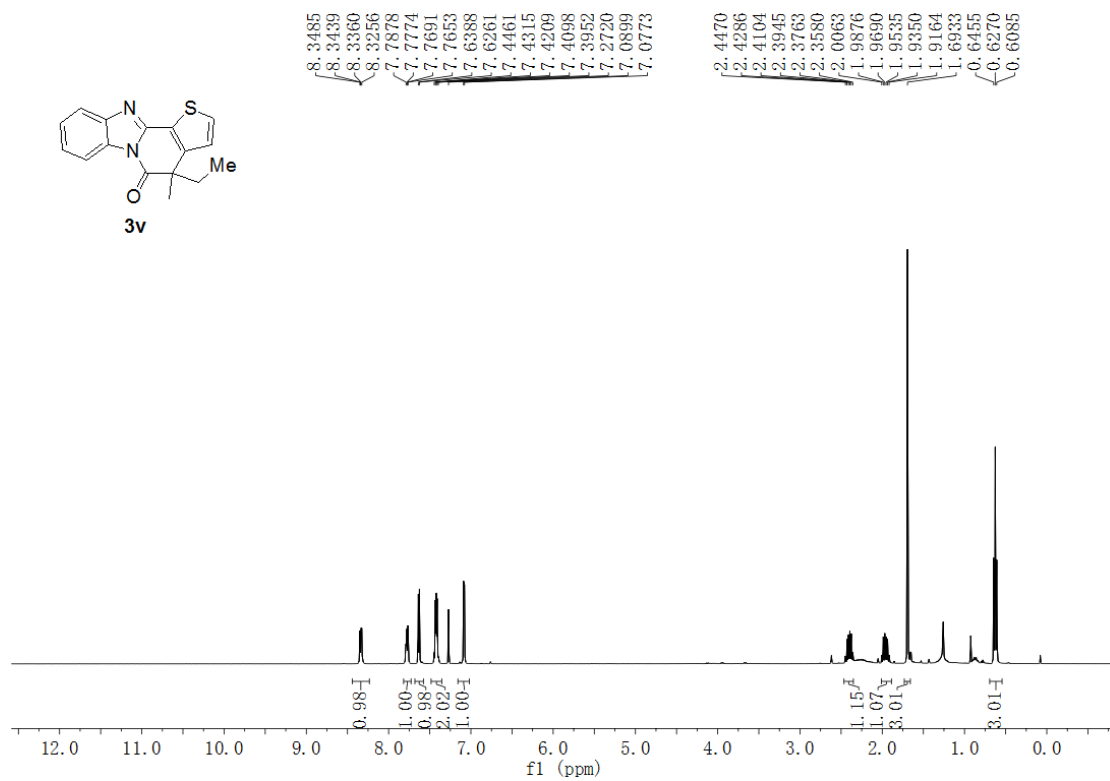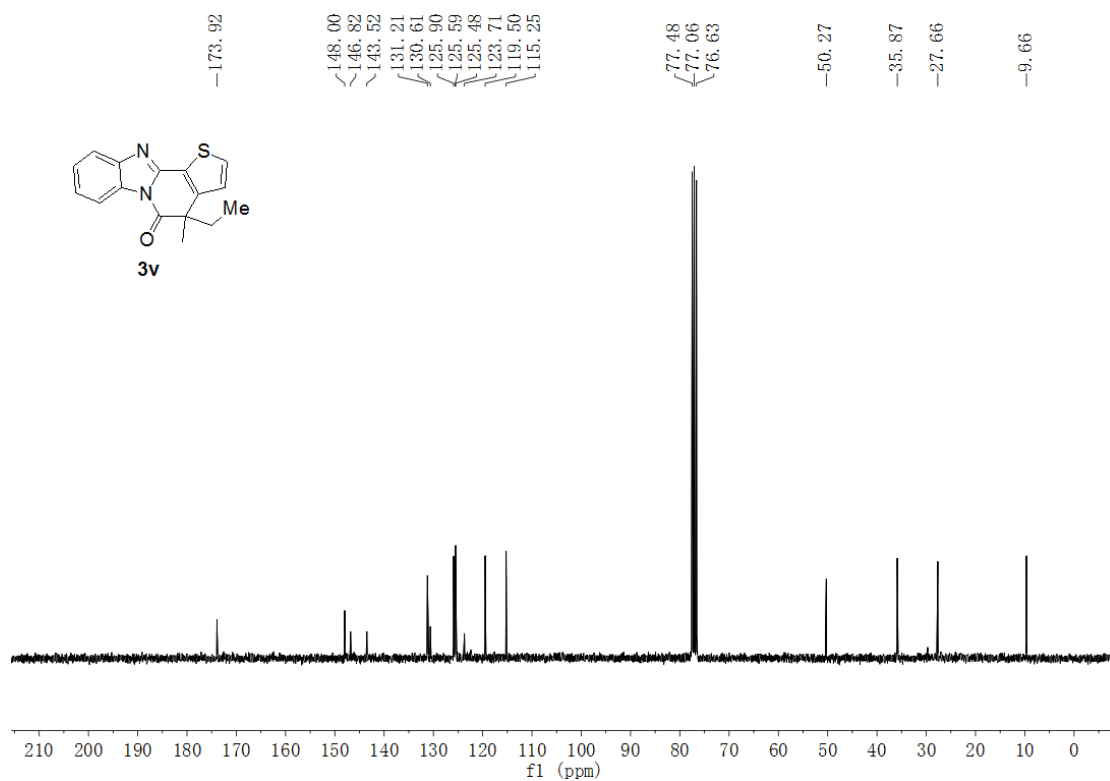

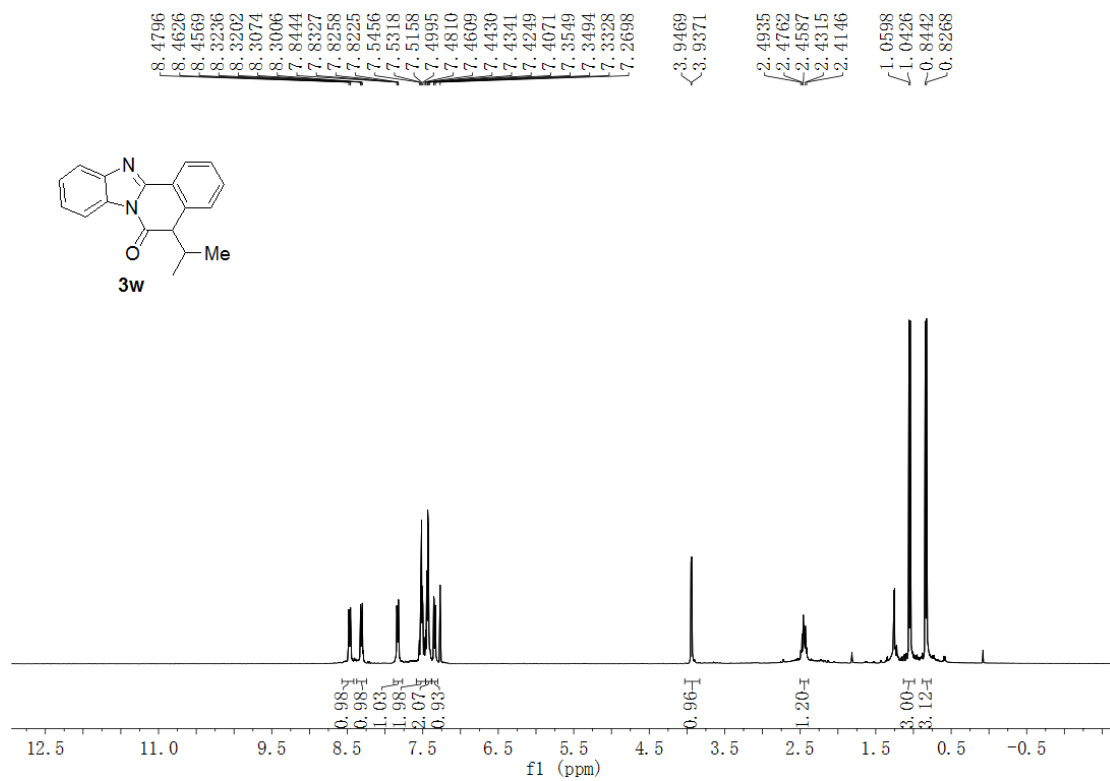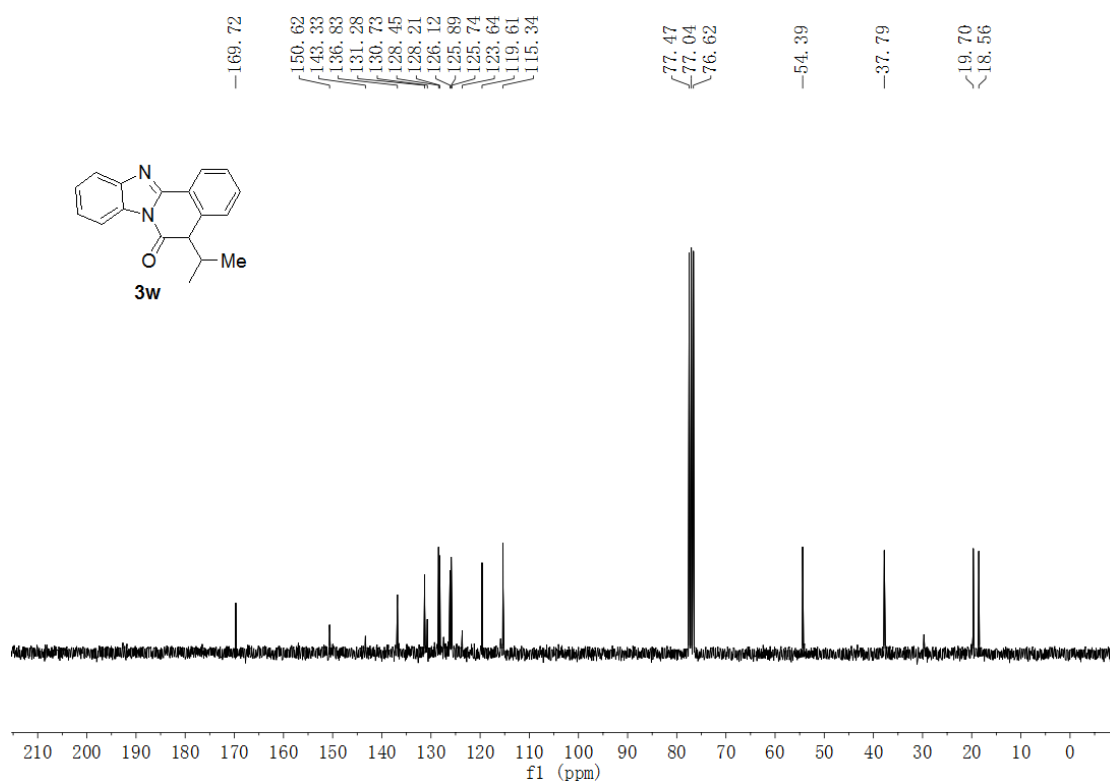



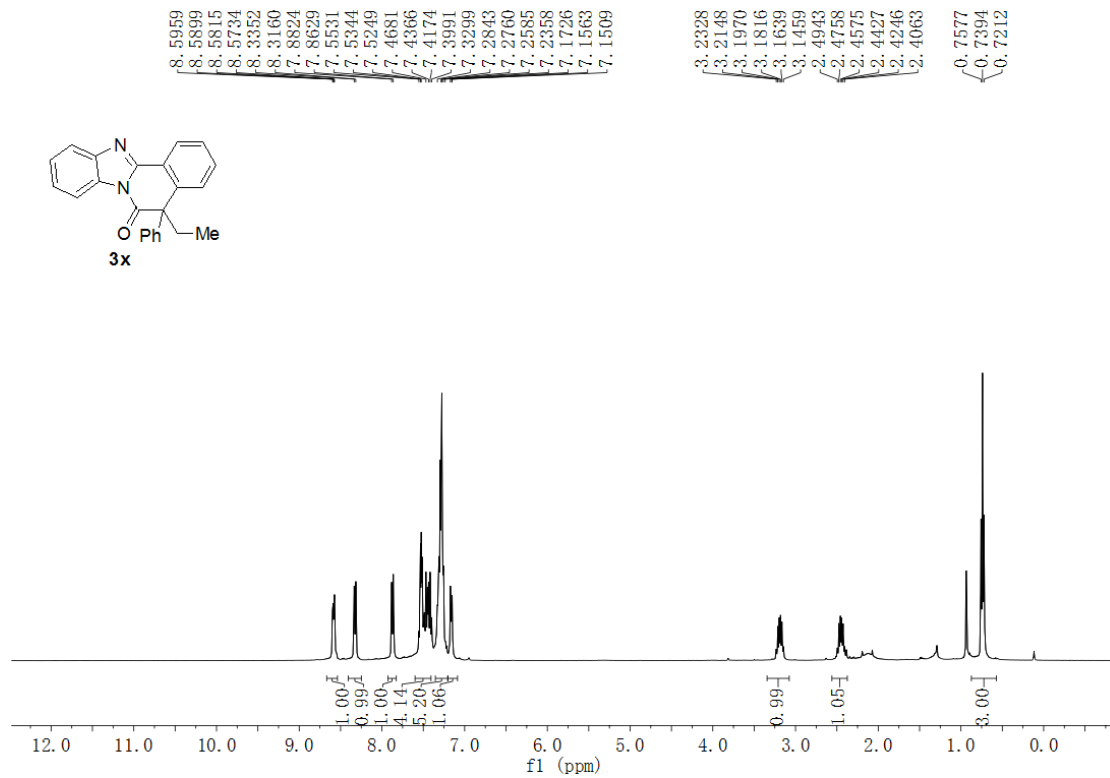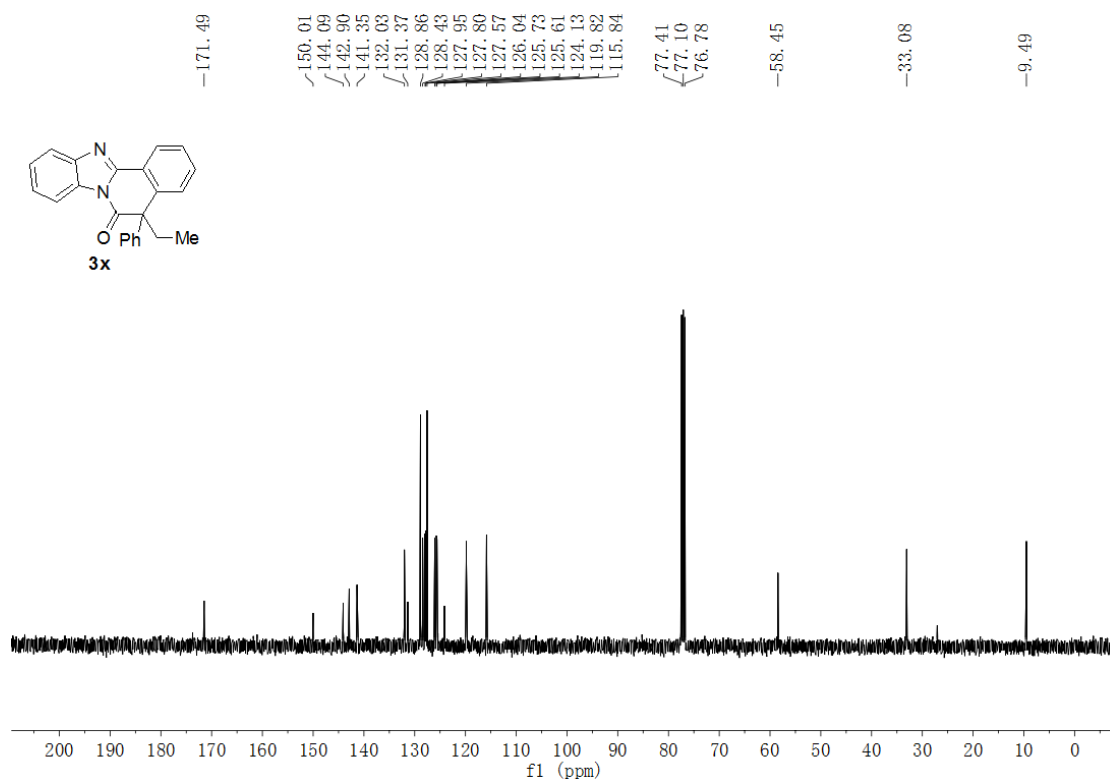

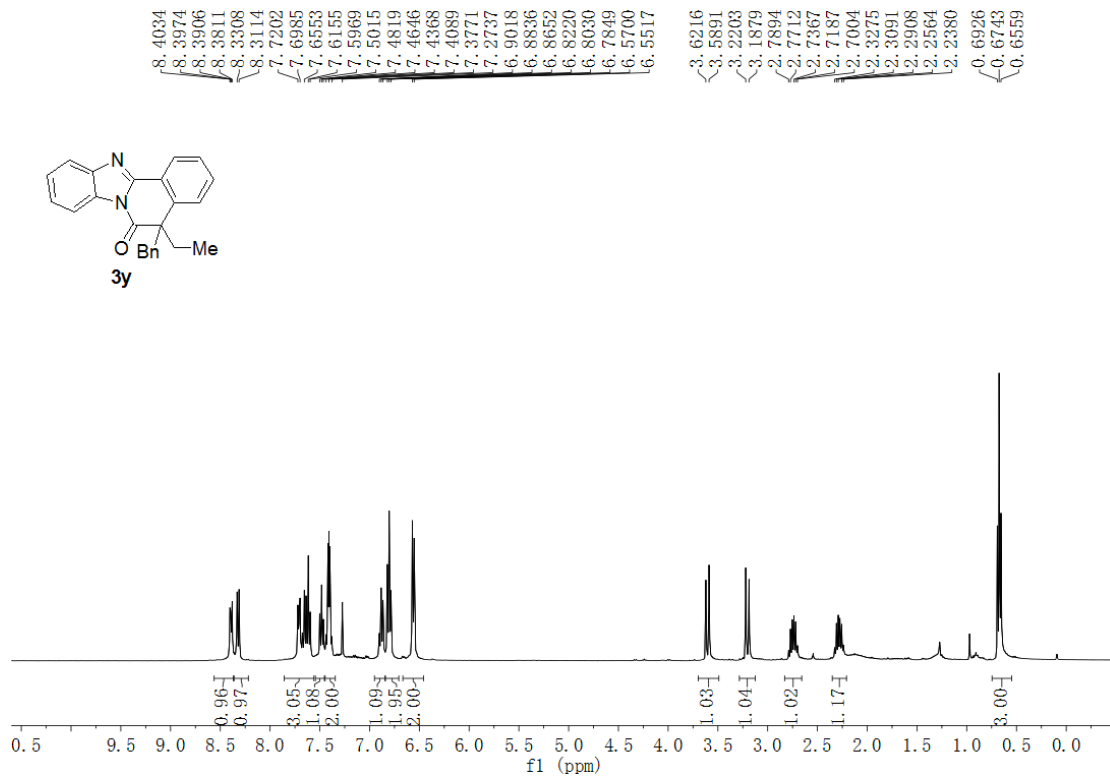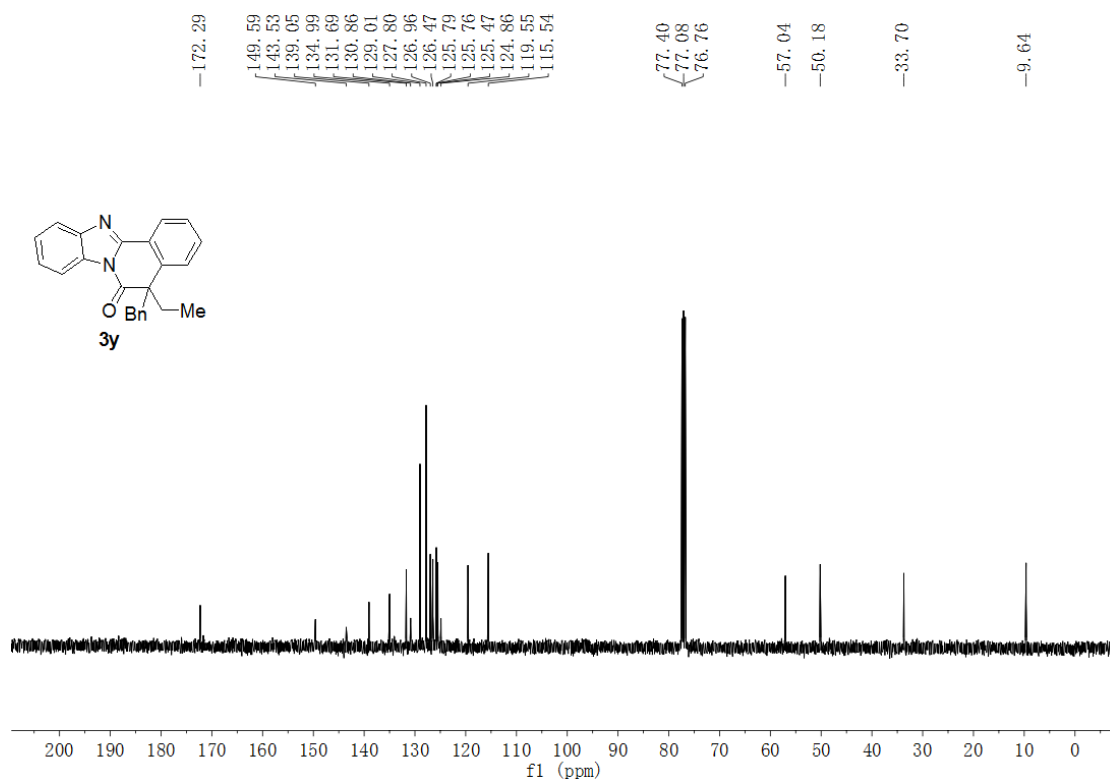

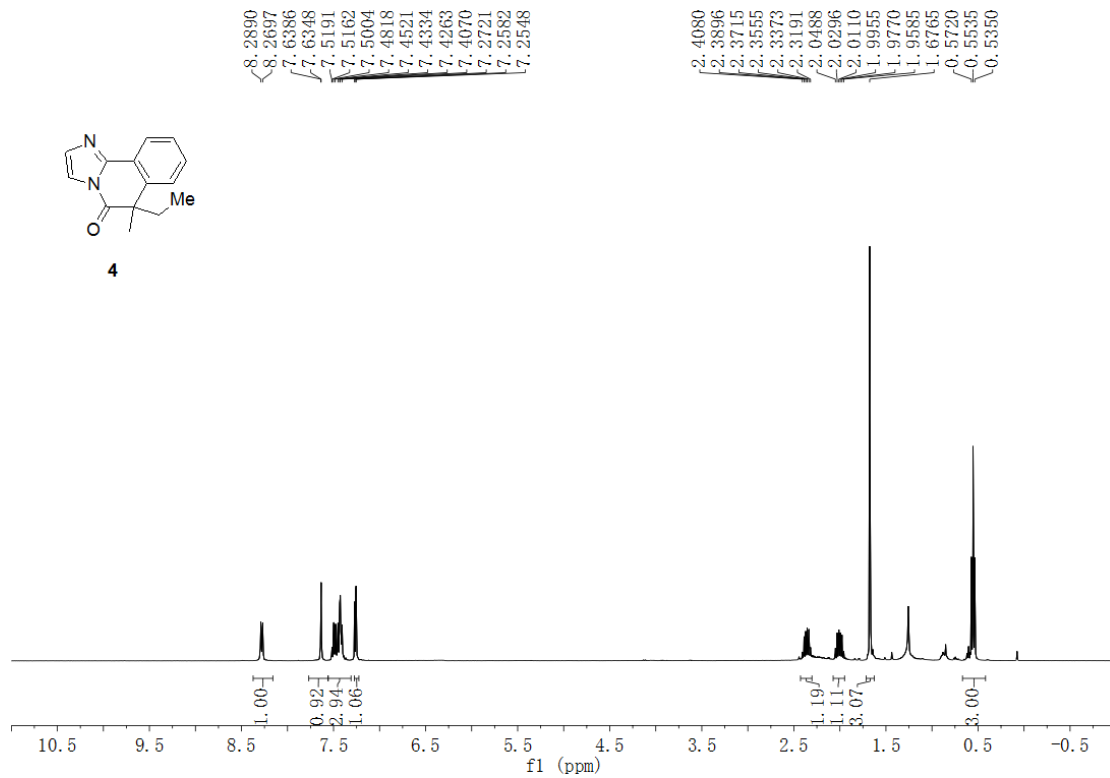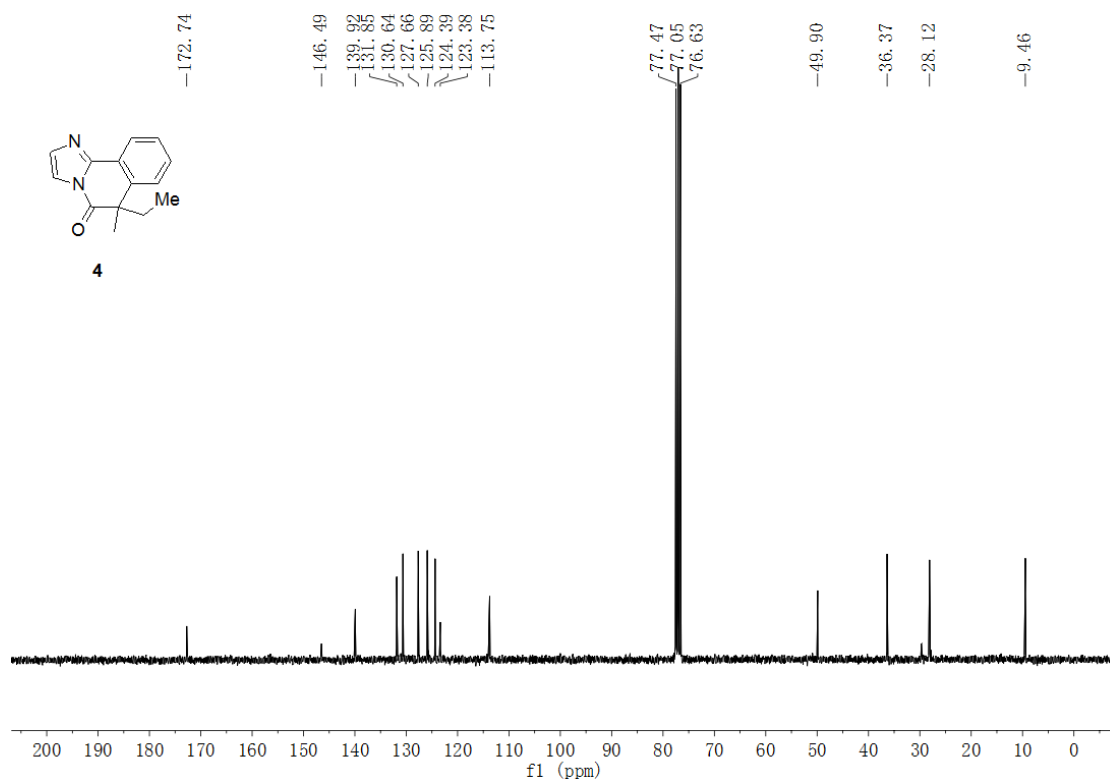

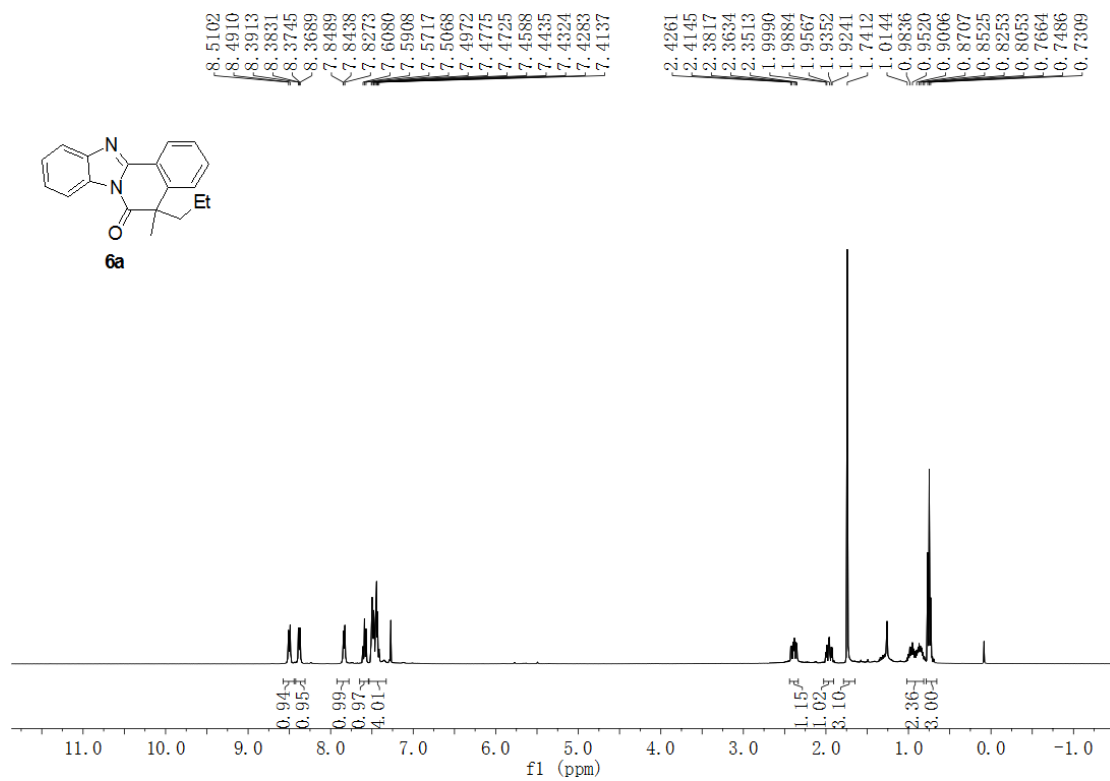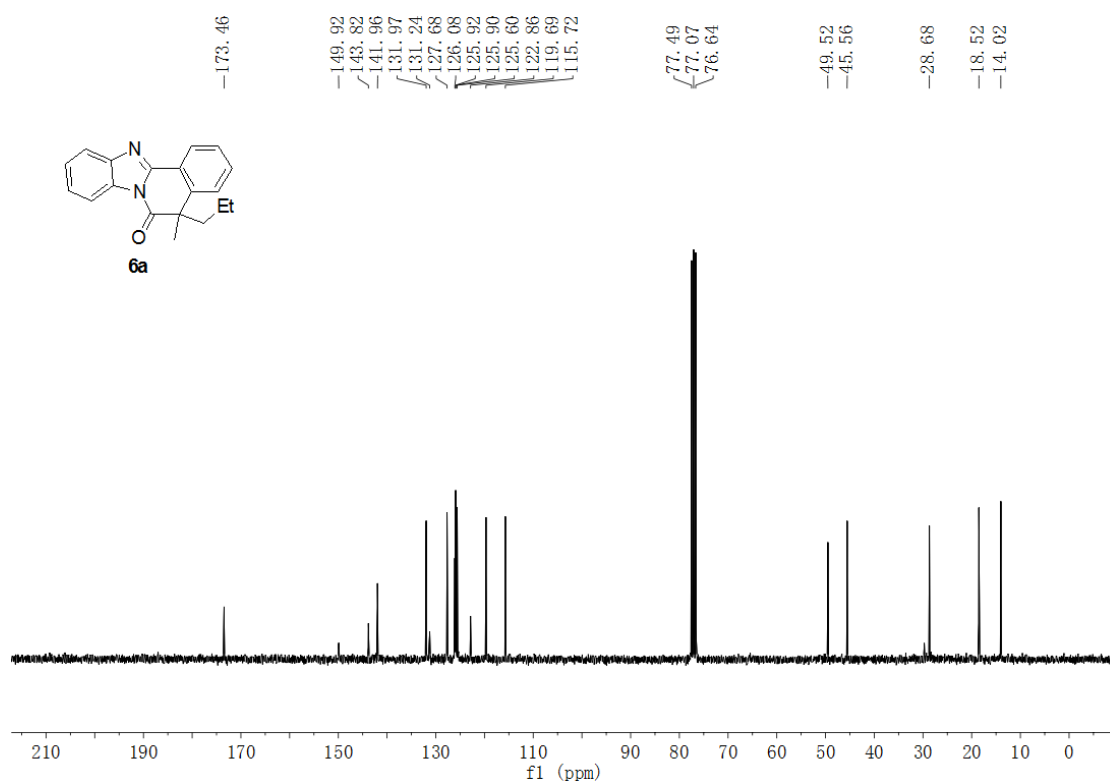

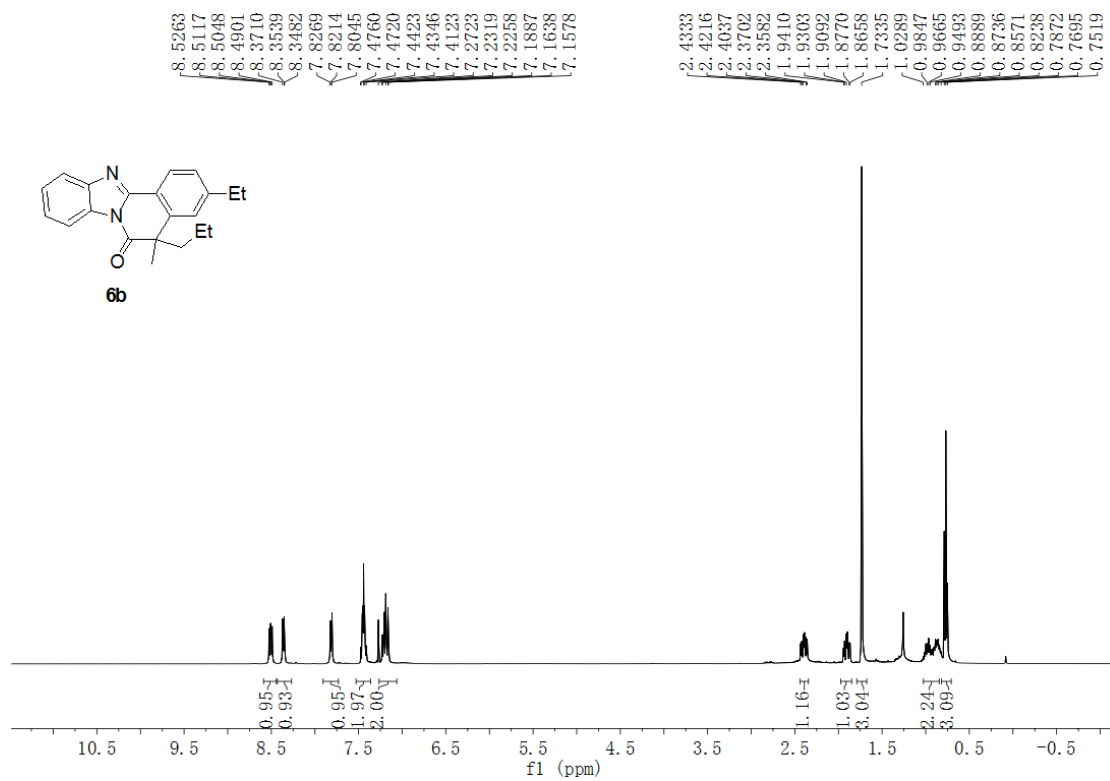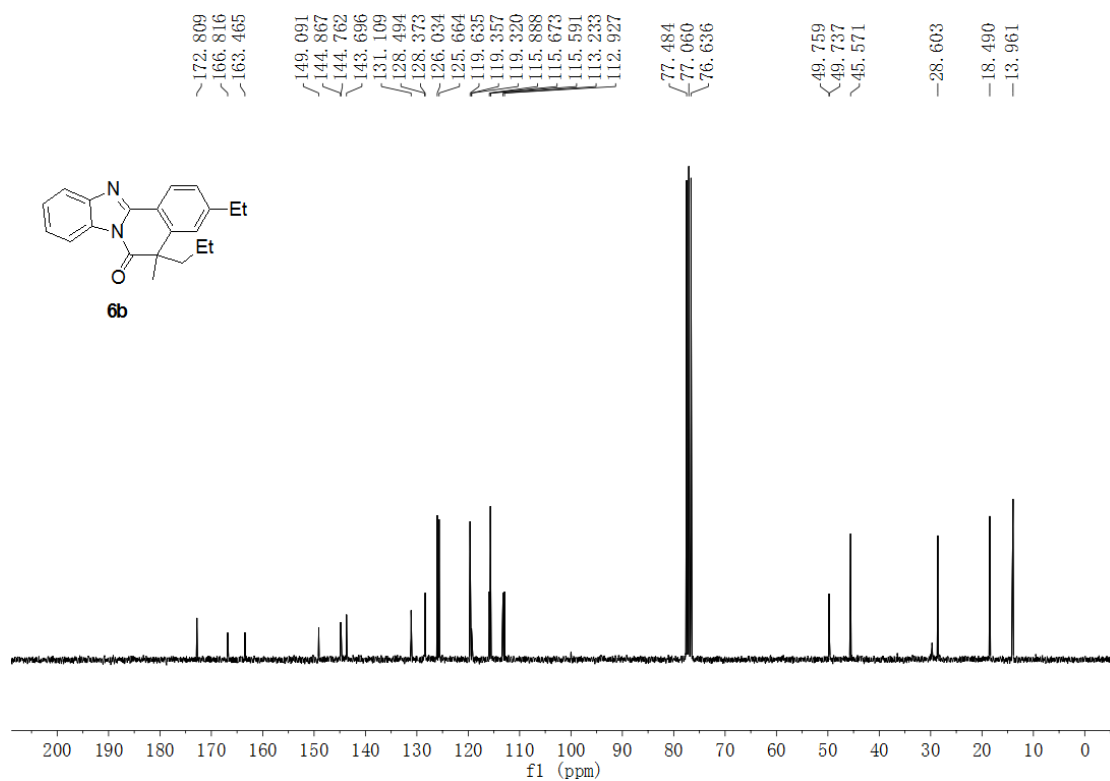

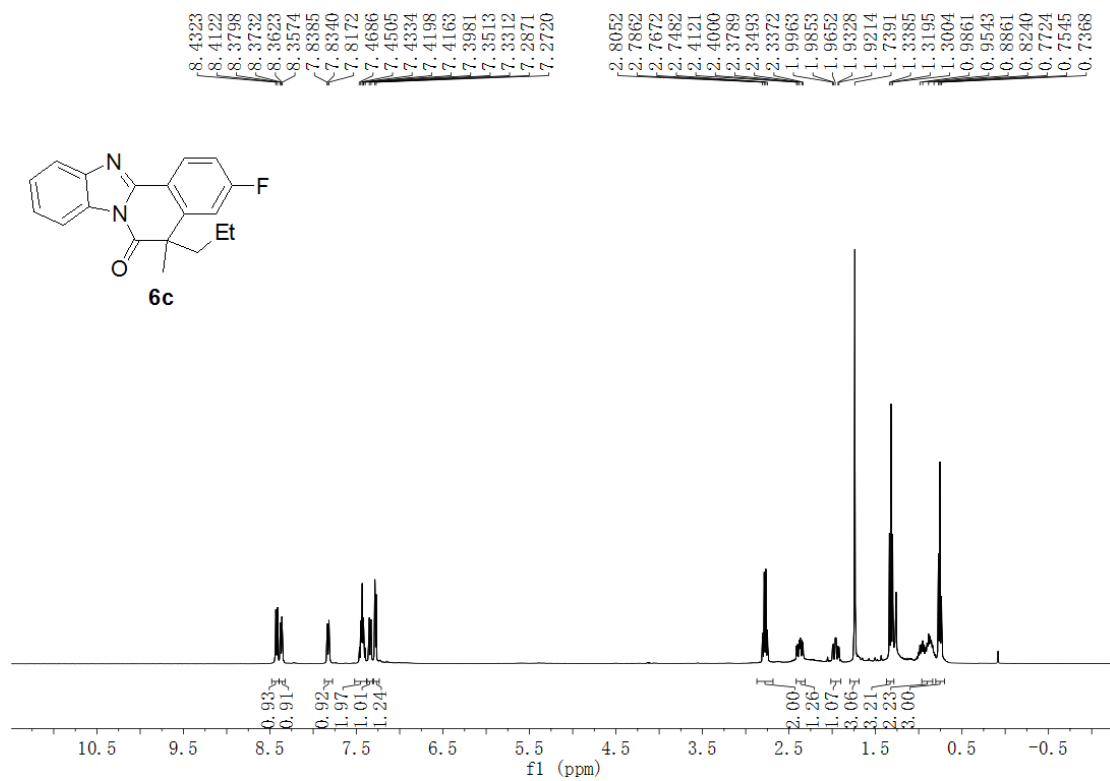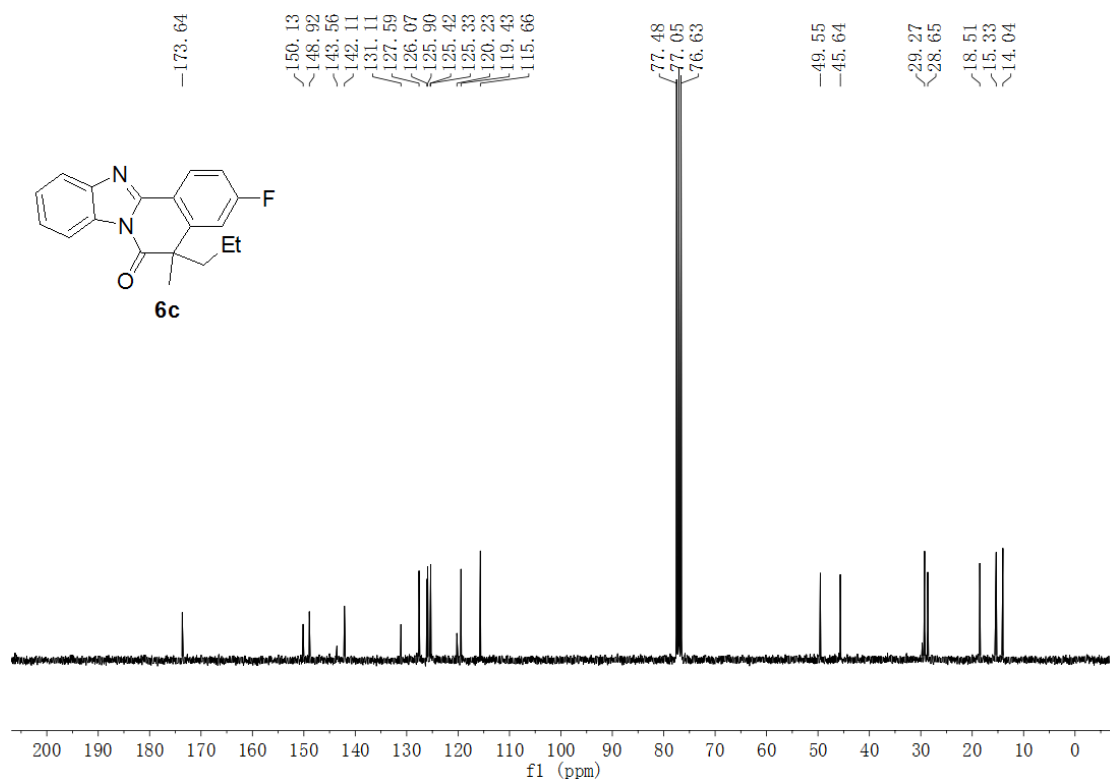

Supplement: d0ob02383c1.pdf [file d0ob02383c1.pdf]
